# Supplementary material for: Self-assembly of tripyrazolate-linked [M6L2] cages for the selective sensing of HSO3− and gaseous SO2 by turn-on fluorescence
Source: Royal Society of Chemistry journal article supplement (doi:10.1039/d3dt00083d), 2023-01-01
Supplement: d3dt00083d1.pdf [file d3dt00083d1.pdf]

### Supplementary Information

#### **N, N', N''-tris(4-acetyl-aniline)**

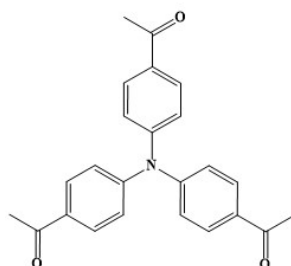

A solution of acetyl chloride (1.12g, 15mmol) and anhydrous aluminum chloride (1.12 g, 15mmol) in dry DCM (dichloromethane) was stirred for 15 minutes. In a nitrogen atmosphere, the mixture was slowly dripped into the DCM (80ml) solution of triphenylamine (1.22g, 5mmol), reaction for 12 hours under the condition of 273–278 K, after that, heated to 313K and continue to react for 12 hours, the resulting mixture was carefully quenched with ethyl alcohol. the organic solvents were evaporated in vacuo. The crude product was extracted three times by DCM, after that, combined organic extract and dried over MgSO<sub>4</sub>. The pure product was obtained by silica gel column chromatography, Yield 1.37 g (73.85 %); <sup>1</sup>H NMR (400 MHz, CDCl<sub>3</sub>, 298K, ppm) δ = 2.60 (s, 9H), 7.18–7.16 (d, 6H), 7.93-7.91 (d, 6H).

#### **N, N', N''-tris[4-(4,4,4-trifluoro-1,3-dioxobutyl)-aniline],**

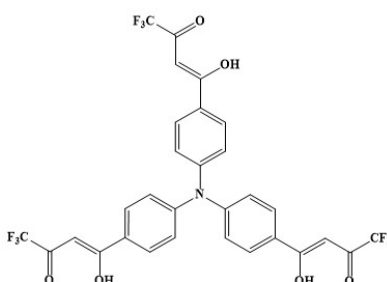

A mixture of sodium ethoxide, (1.09 g, 16.0mmol) N, N', N''-tris(4-acetyl-aniline) (1.85 g, 5 mmol) and ethyl trifluoroacetate (2.30 g, 16.2 mmol) in 30 mL ethyl alcohol. Then, reaction for 12 hours under the condition of ice water bath. The resulting solution was acidified to pH 3-4 using hydrochloric acid (1 M solution). The

crude product was extracted three times by EA (ethyl acetate), combined organic extract and dried over  $\text{MgSO}_4$ . Recrystallization with acetonitrile, yellow needle crystals were filtered and dried in vacuum, Yield 2.02 g (61.30 %);  $^1\text{H NMR}$  ( $\text{CDCl}_3$ , 400 MHz, 298K, ppm):  $\delta = 15.41$  (s, 3H), 7.96–7.95 (d, 6H), 7.23–7.21 (d, 6H), 6.54 (s, 3H).

**Tris(4-(5-(trifluoromethyl)-1H-pyrazol-3-yl) phenyl) amine,  $\text{H}_3\text{L}$**

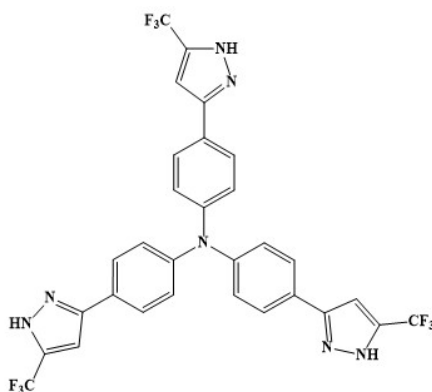

A mixture of hydrazine hydrate, (1.30 g, 25.0mmol) and N, N', N''-tris[4-(4,4,4-trifluoro-1,3-dioxobutyl)-aniline] (1.65g, 2.5mmol) in 30 mL methyl alcohol. reaction for 12 hours under the condition of 333 K, after that, yellow precipitate was filtered and dried in vacuum, Yield 1.50g (92.76 %);  $^1\text{H NMR}$  (DMSO, 400 MHz, 298K, ppm):  $\delta = 7.14$  (s, 3H), 7.18–7.16 (d, 6H), 7.79–7.81 (d, 6H).  $^{13}\text{C NMR}$  (100 MHz, DMSO, 298K, ppm):  $\delta$  147.30, 144.14, 127.49, 124.73, 123.59, 120.92, 101.02.

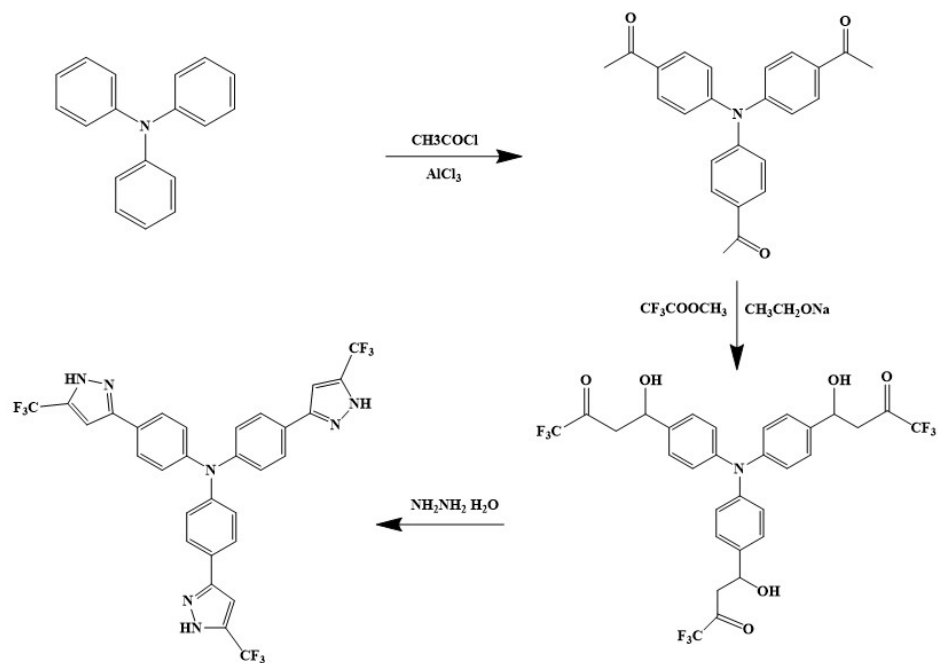

**Fig. S1** Synthetic route of **H<sub>3</sub>L**.

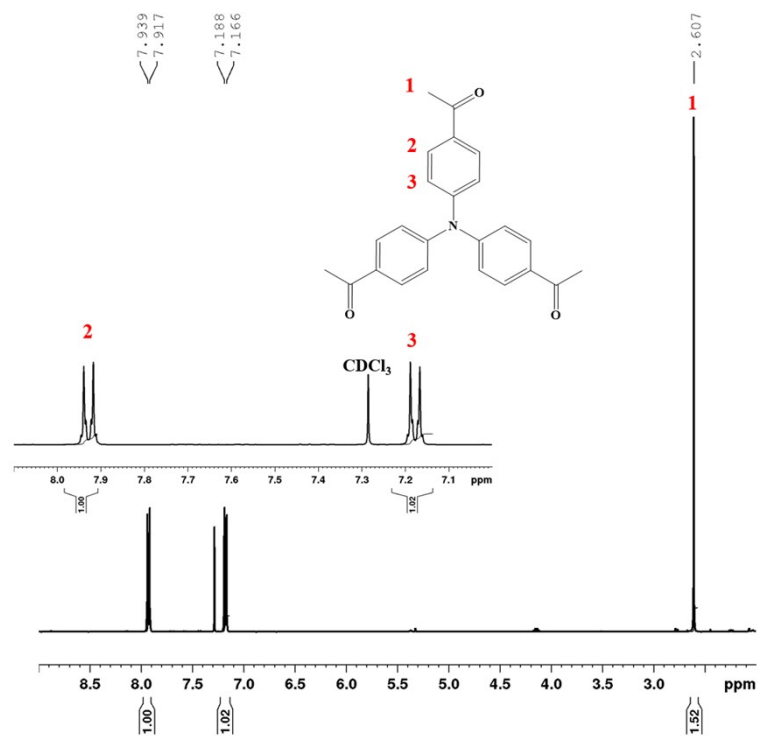

**Fig. S2**  $^1\text{H}$  NMR spectrum of **N, N', N''-tris(4-acetyl-aniline)** in  $\text{CDCl}_3$ .

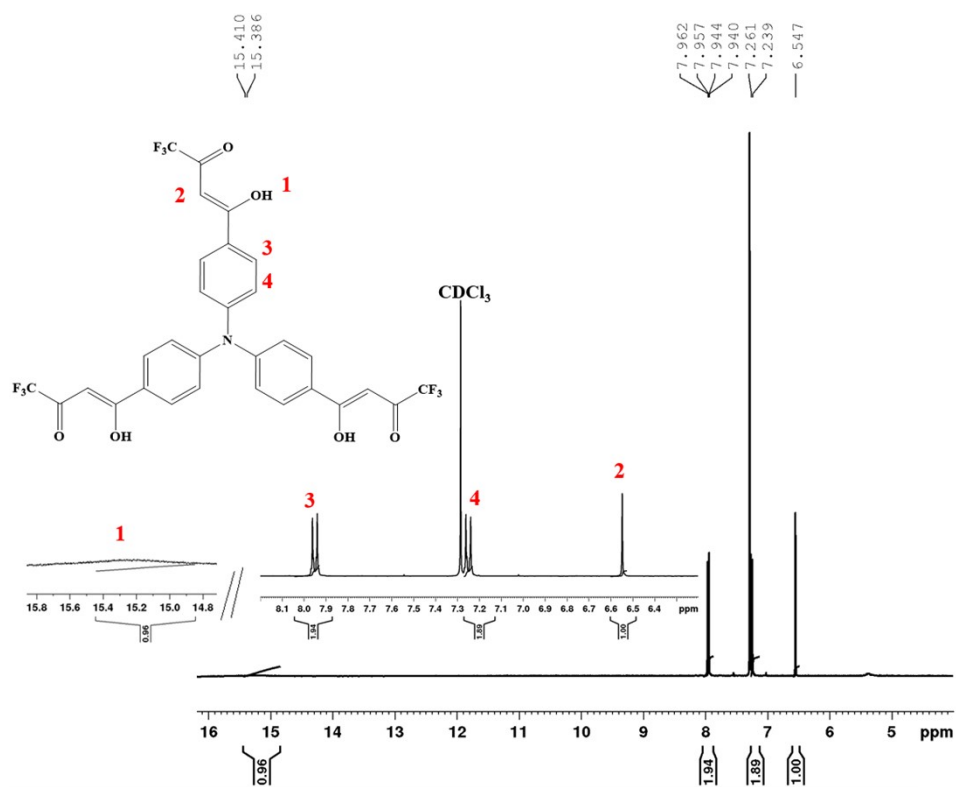

**Fig. S3**  $^1\text{H}$  NMR spectrum of  $N, N', N''$ -tris[4-(4,4,4-trifluoro-1,3-dioxobutyl)-aniline] in  $\text{CDCl}_3$ .

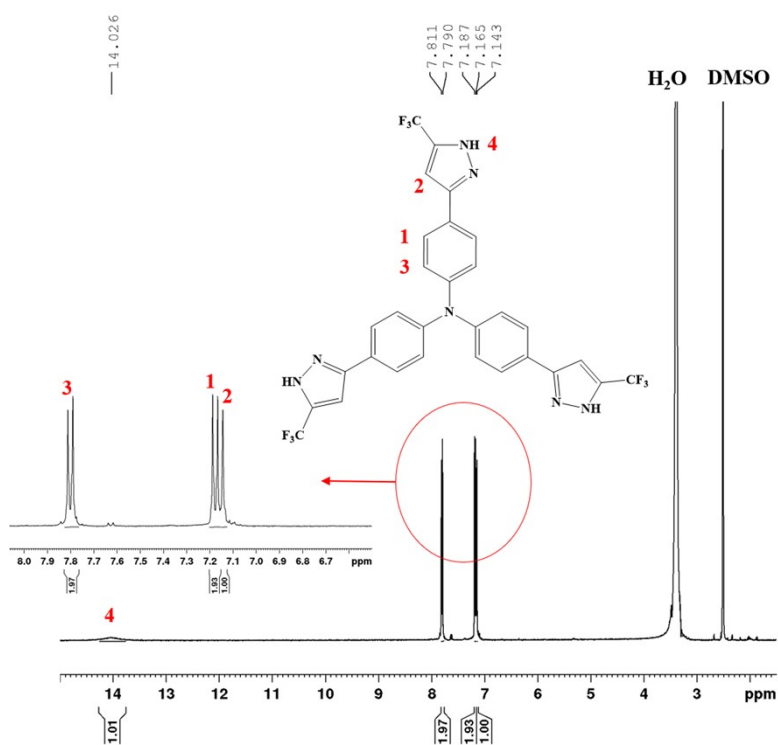

**Fig. S4**  $^1\text{H}$  NMR spectrum of  $\text{H}_3\text{L}$  in  $\text{DMSO-d}_6$ .

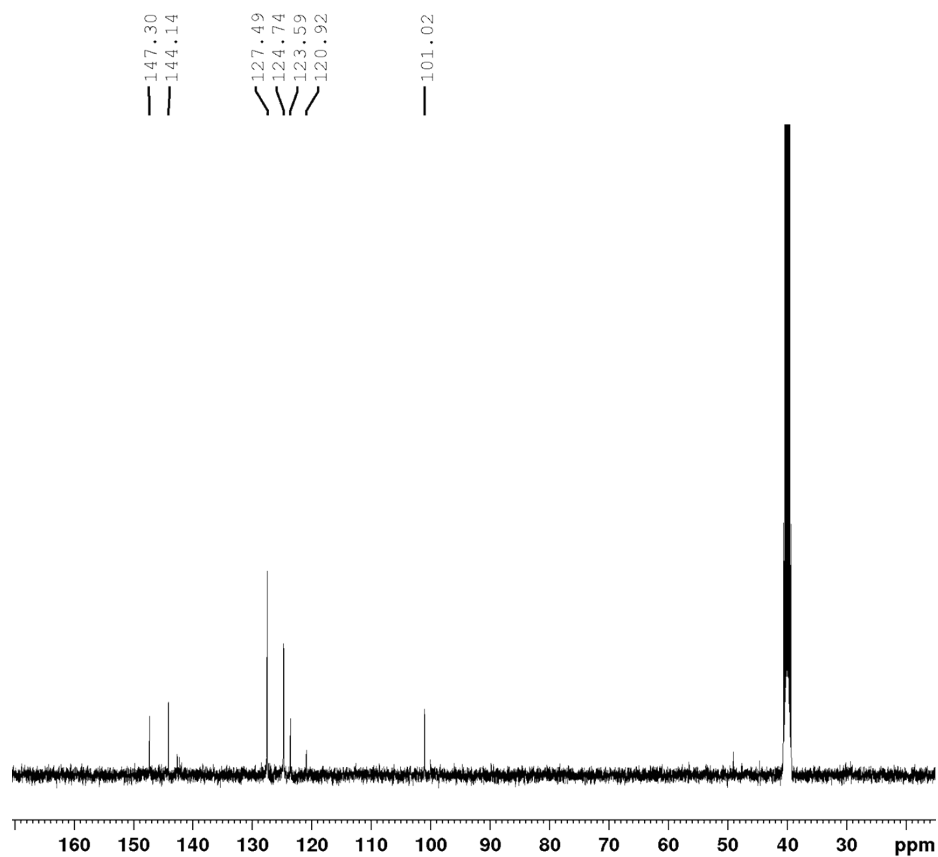

Fig. S5  $^{13}\text{C}$  NMR spectrum of  $\text{H}_3\text{L}$  in  $\text{DMSO-d}_6$ .

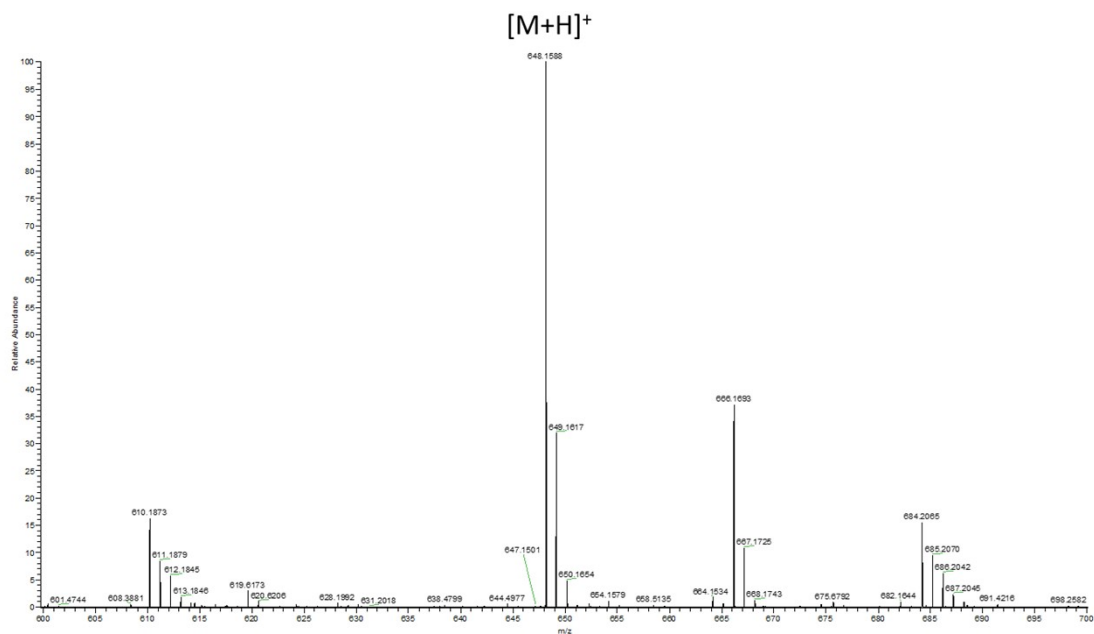

Fig. S6 ESI-MS of  $\text{H}_3\text{L}$  in  $\text{CH}_3\text{CN}$ .

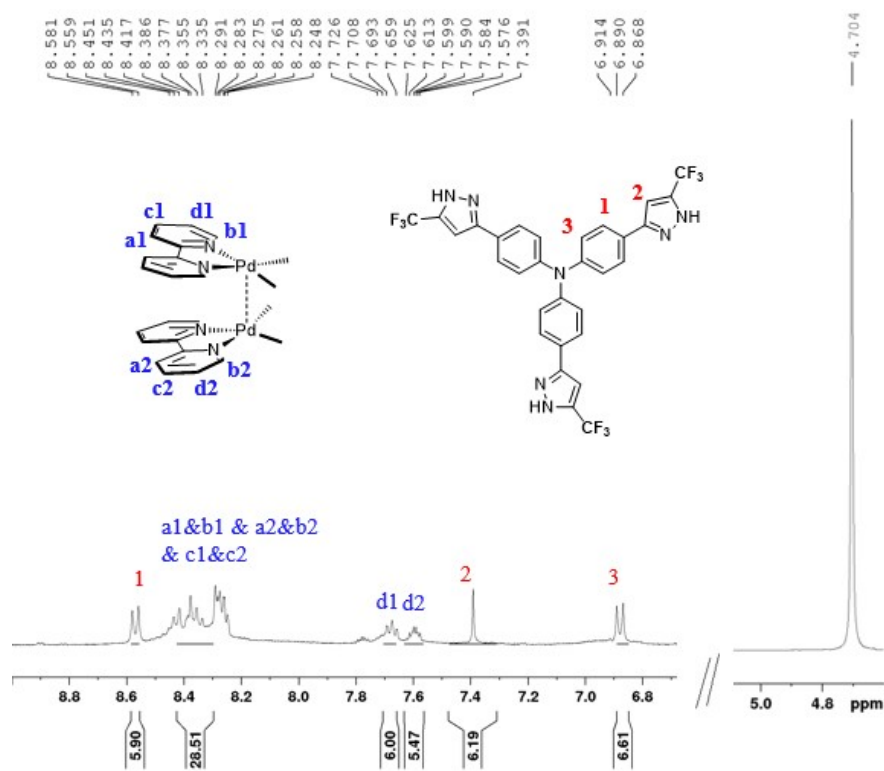

Fig. S7 The <sup>1</sup>H NMR spectrum of **1** in D<sub>2</sub>O at 298 K.

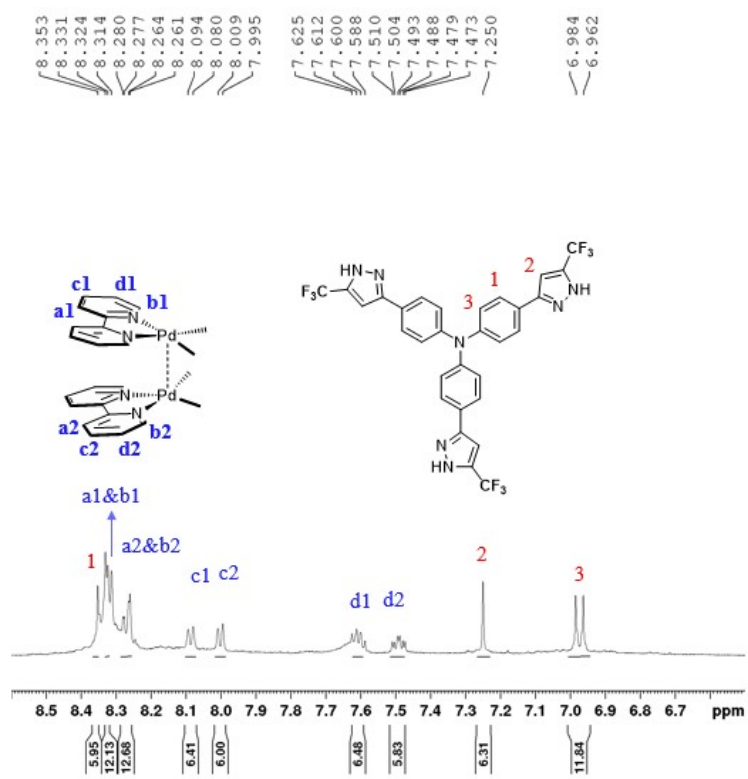

Fig. S8 The <sup>1</sup>H NMR spectrum of **1a** in CD<sub>3</sub>CN at 298 K.

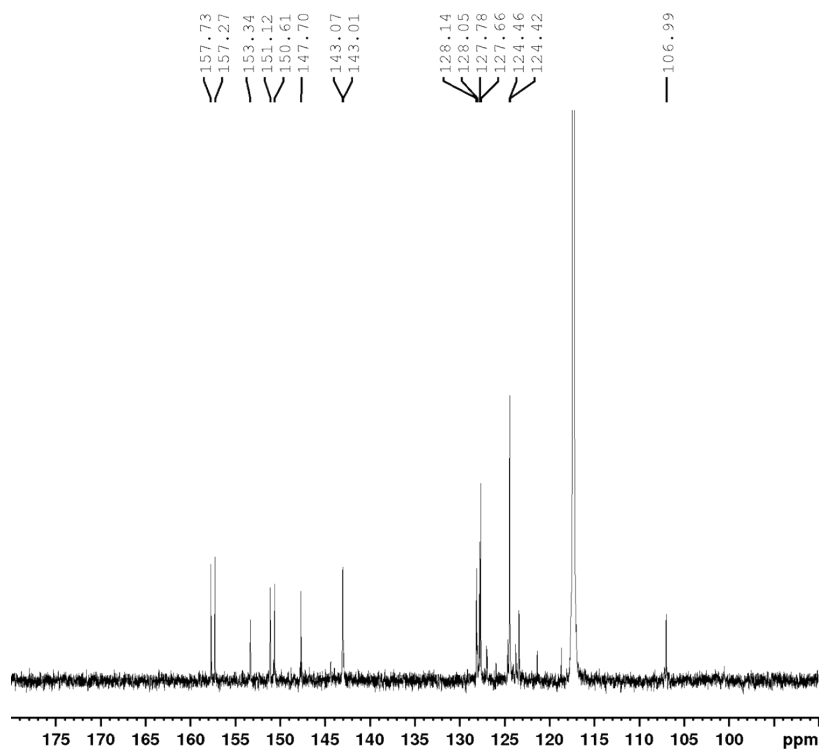

Fig. S9 The  $^{13}\text{C}$  NMR spectrum of **1a** in  $\text{CD}_3\text{CN}$  at 298 K.

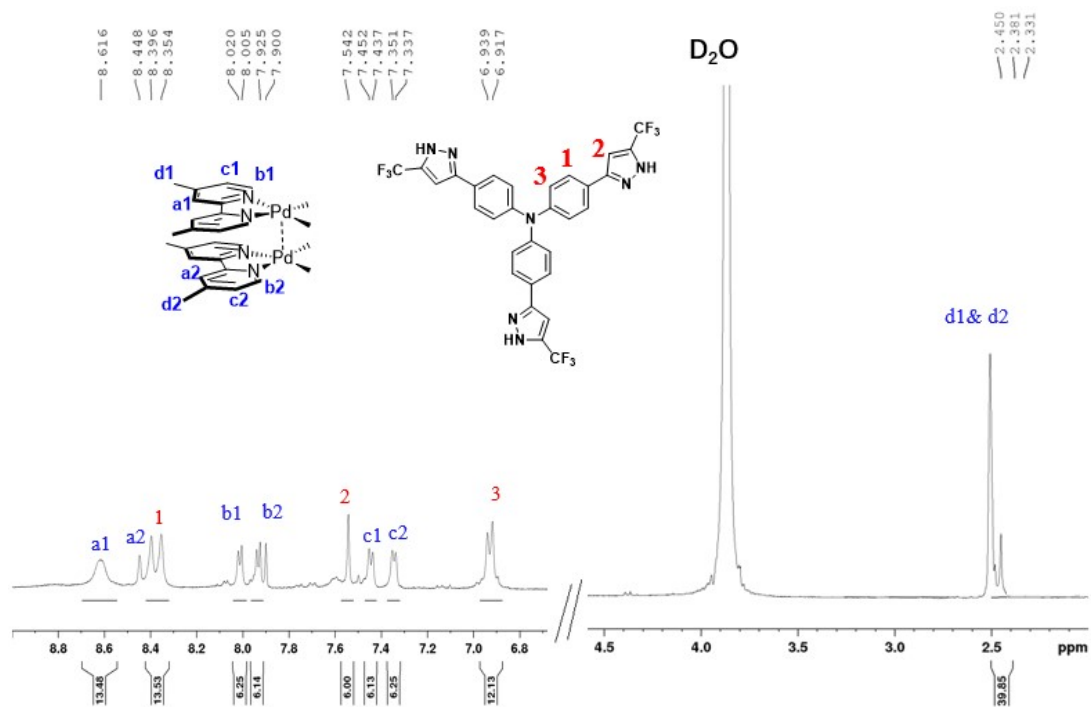

Fig. S10 The  $^1\text{H}$  NMR spectrum of **2** in  $\text{D}_2\text{O}$  at 298 K.

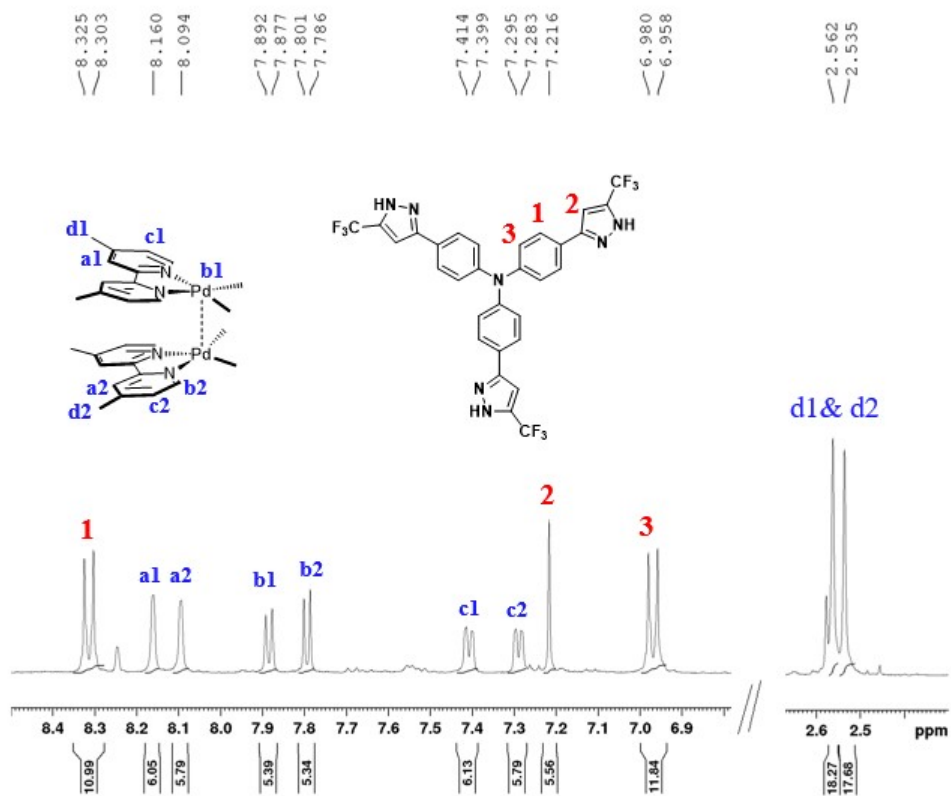

Fig. S11 The  $^1\text{H}$  NMR spectrum of **2a** in  $\text{CD}_3\text{CN}$  at 298 K.

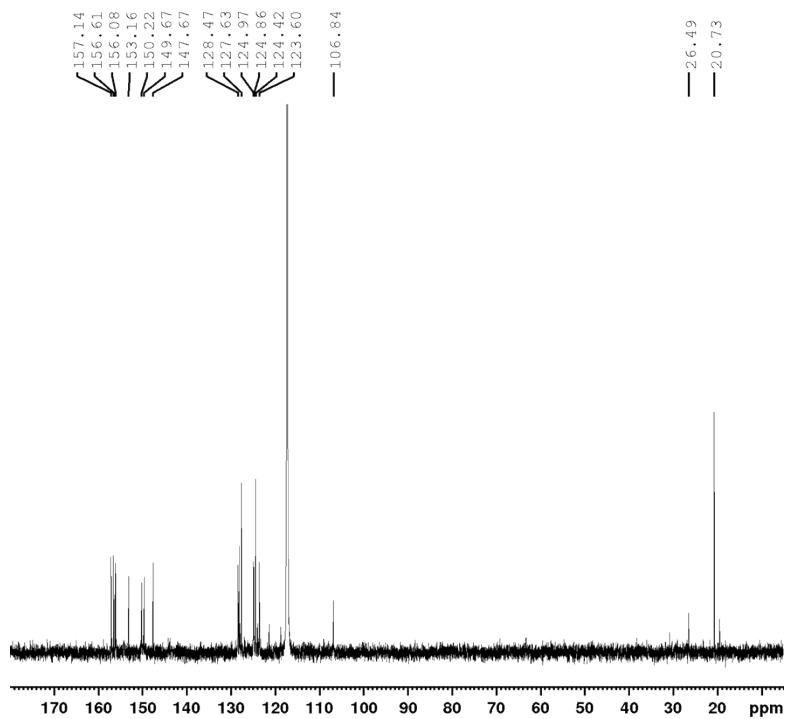

Fig. S12 The  $^{13}\text{C}$  NMR spectrum of **2a** in  $\text{CD}_3\text{CN}$  at 298 K.



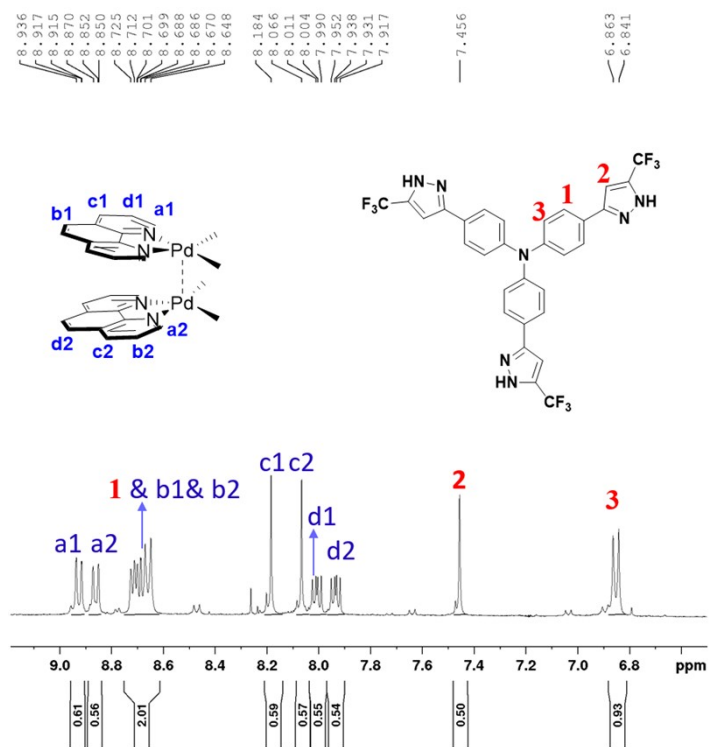

**Fig. S13** The <sup>1</sup>H NMR spectrum of **3** in D<sub>2</sub>O at 298 K.

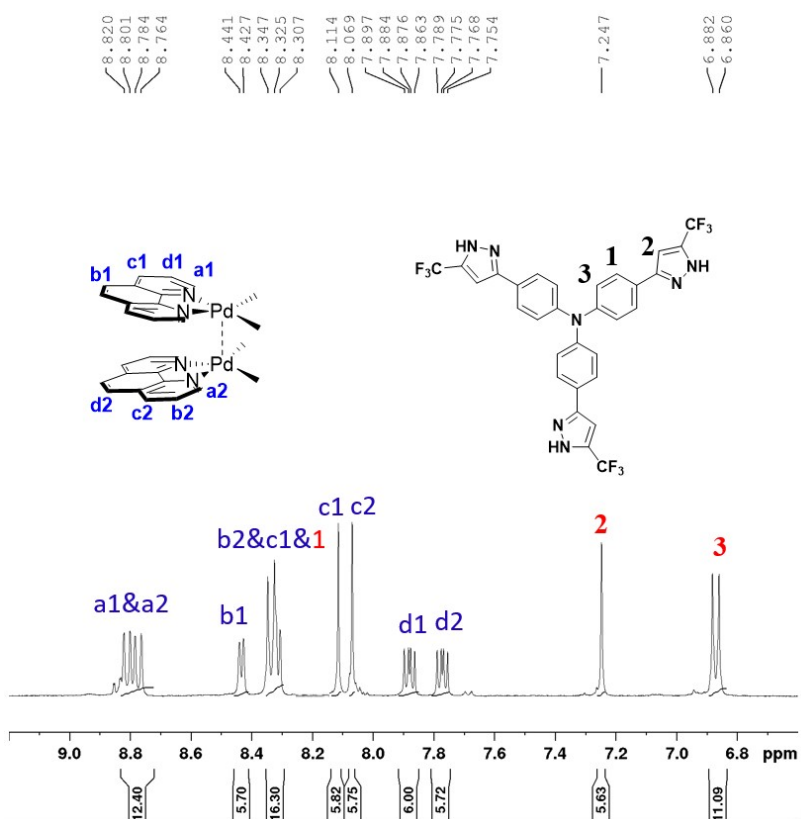

**Fig. S14** The <sup>1</sup>H NMR spectrum of **3a** in CD<sub>3</sub>CN at 298 K.

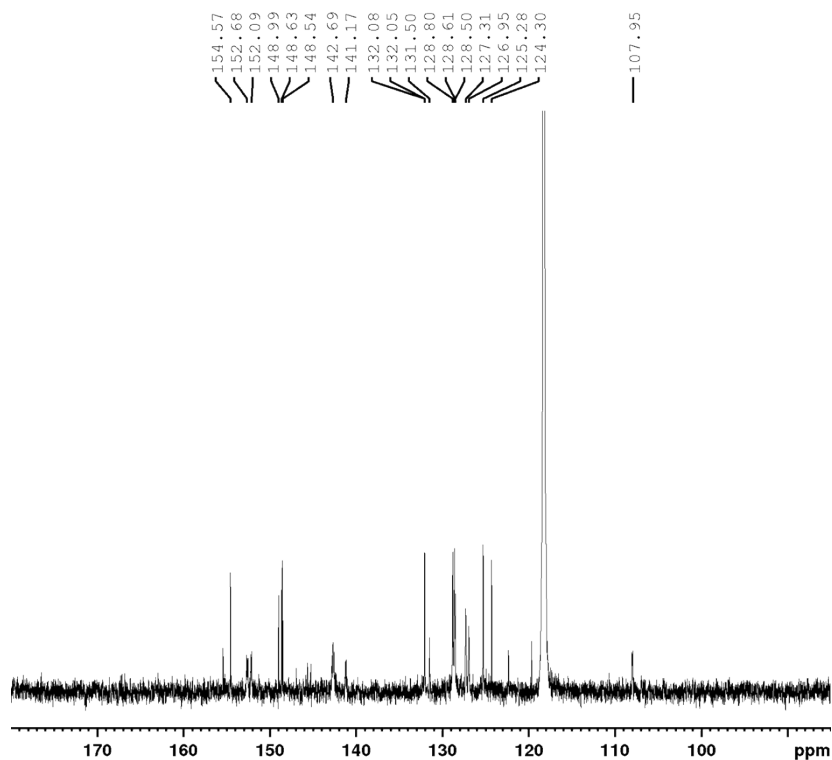

Fig. S15 The  $^{13}\text{C}$  NMR spectrum of **3a** in  $\text{CD}_3\text{CN}$  at 298 K.

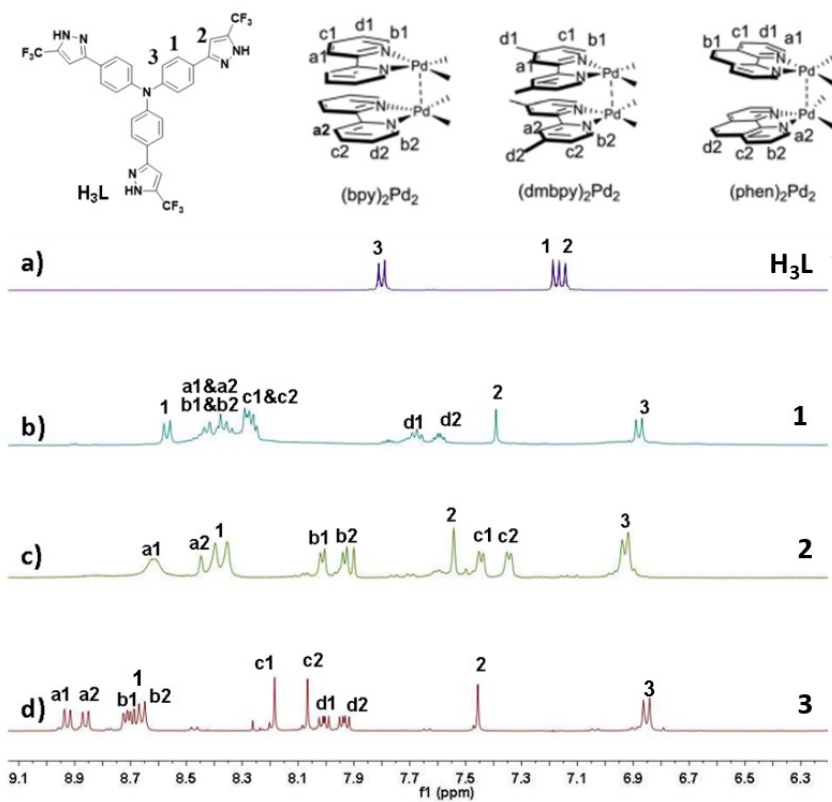

Fig. S16 The  $^1\text{H}$  NMR spectra of  $\text{H}_3\text{L}$  (a), **1** (b), **2** (c), **3** (d) in  $\text{D}_2\text{O}$  at 298K.

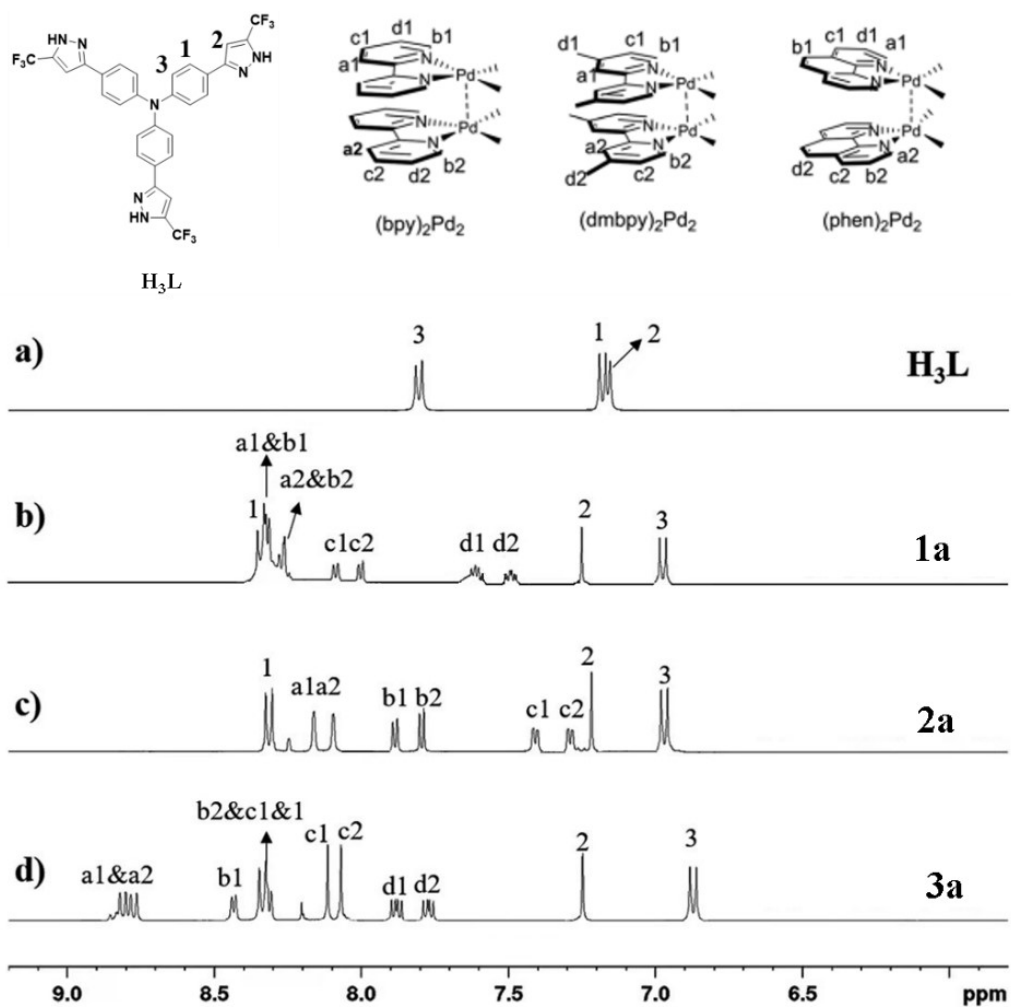

**Fig. S17** The  $^1H$  NMR spectra of  $H_3L$  (a), **1a** (b), **2a** (c), **3a** (d) in  $CD_3CN$  at 298K.

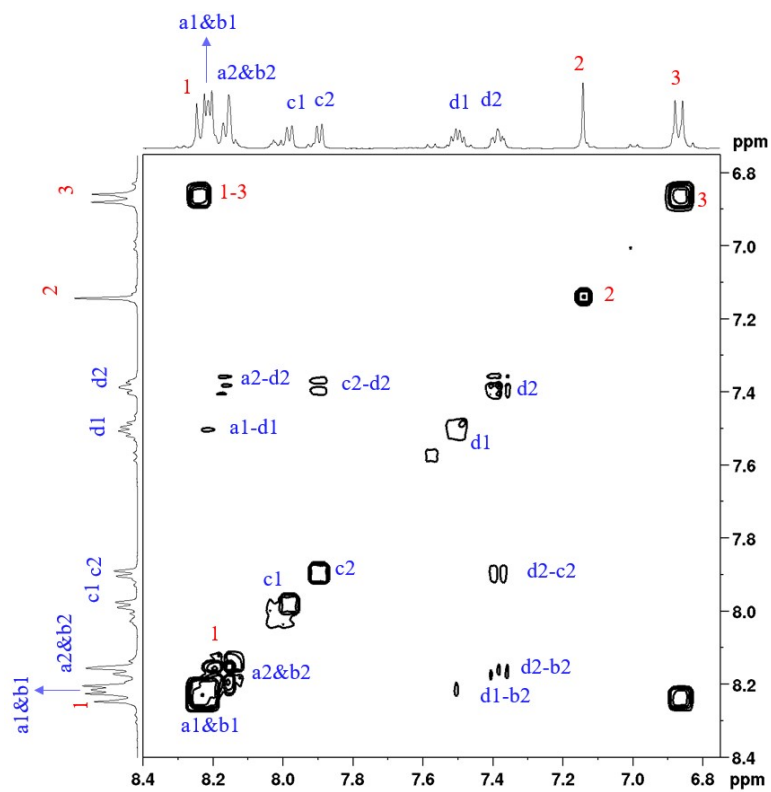

Fig. S18  $^1\text{H}$ - $^1\text{H}$  COSY spectrum of **1a** in  $\text{CD}_3\text{CN}$  at 298 K.

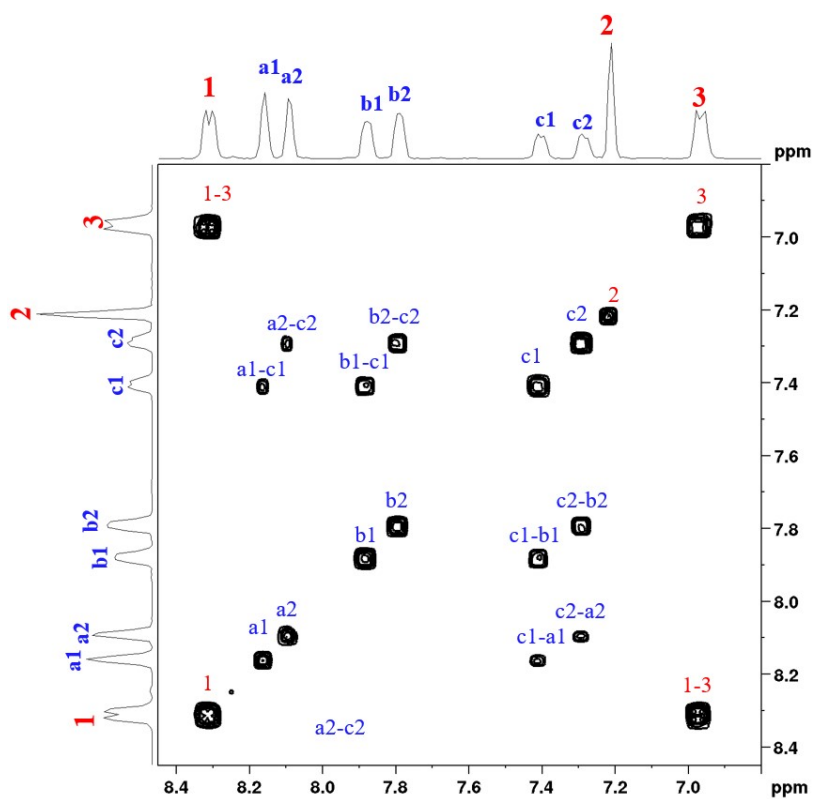

Fig. S19  $^1\text{H}$ - $^1\text{H}$  COSY spectrum of **2a** in  $\text{CD}_3\text{CN}$  at 298 K.

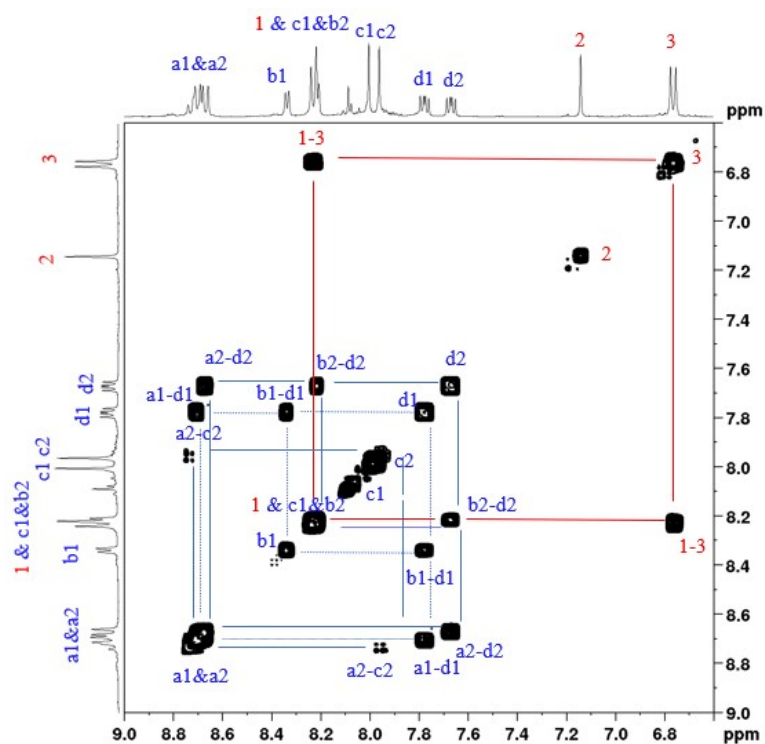

Fig. S20  $^1\text{H}$ - $^1\text{H}$  COSY spectrum of **3a** in  $\text{CD}_3\text{CN}$  at 298 K.

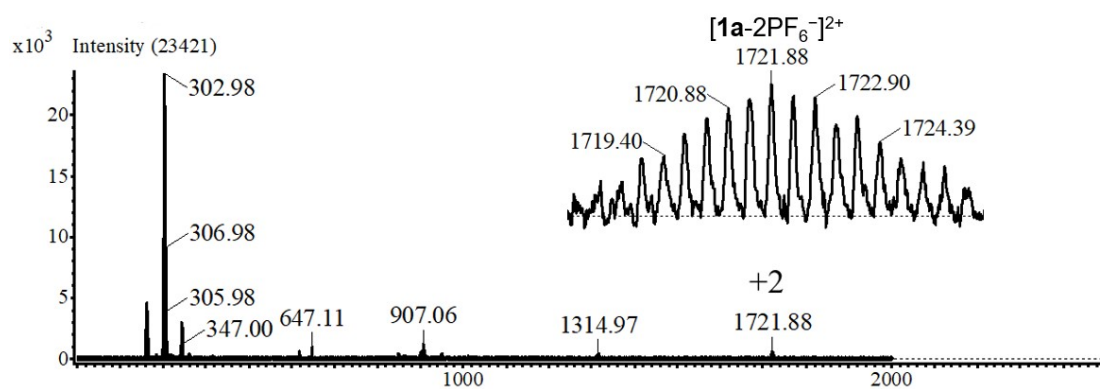

Fig. S21 ESI-MS spectra of **1a** in  $\text{CH}_3\text{CN}$ ; the inset shows the isotopic distribution of the species  $[\mathbf{1a}-2\text{PF}_6^-]^{2+}$ . (cal. 1720.78)

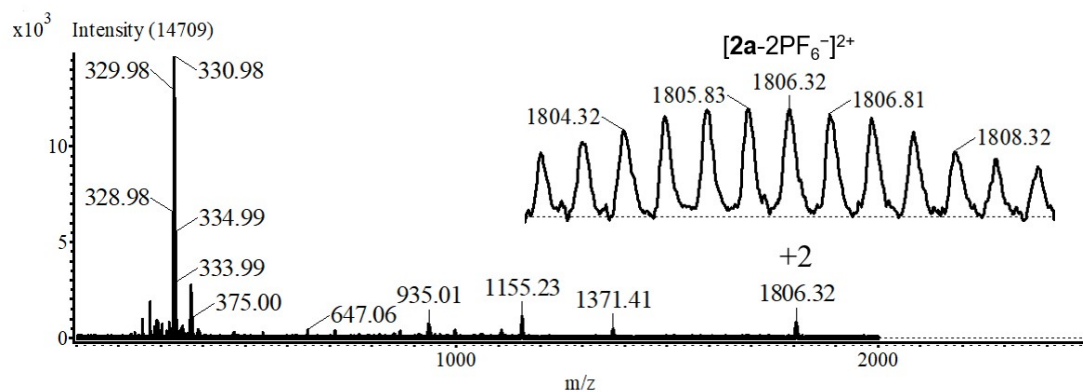

**Fig. S22** ESI-MS spectra of **2a** in  $\text{CH}_3\text{CN}$ ; the inset shows the isotopic distribution of the species  $[\mathbf{2a}-2\text{PF}_6^-]^{2+}$ . (cal. 1801.78)

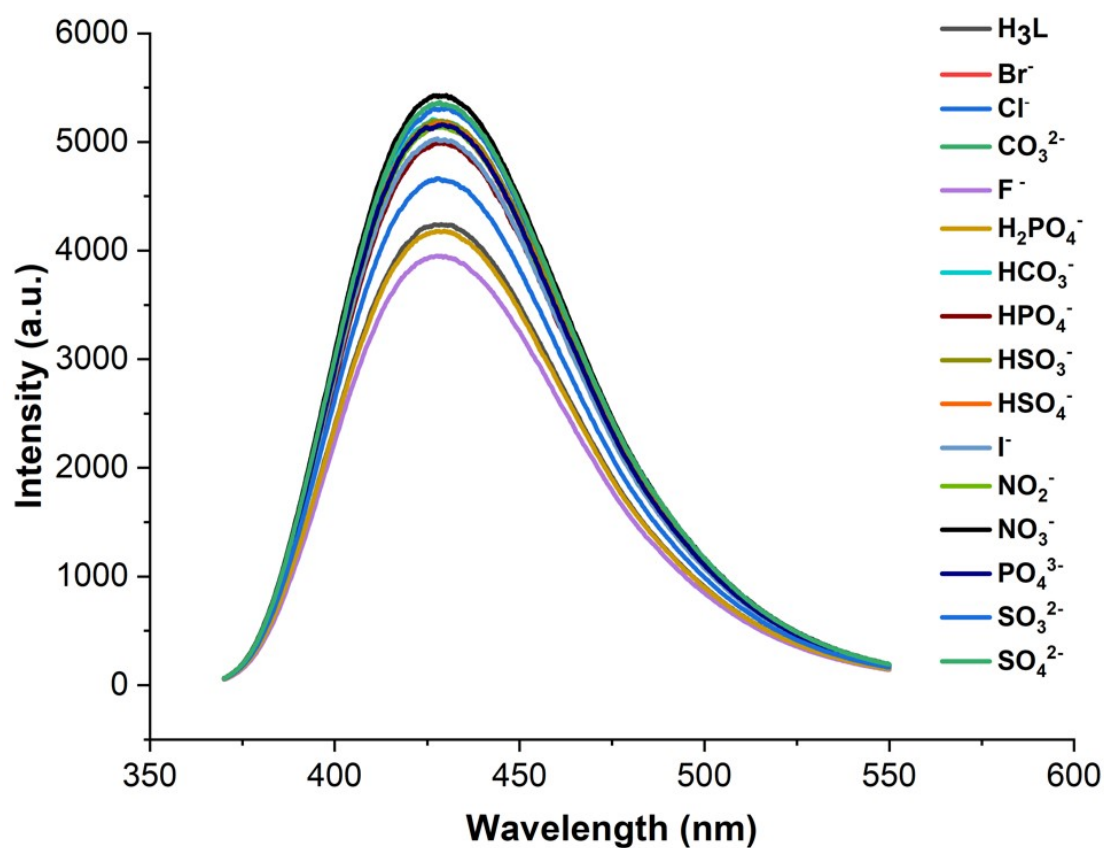

**Fig. S23** Changes in fluorescent intensity for  $\text{H}_3\text{L}$  ( $1.0 \times 10^{-5} \text{ M}$ ) in  $\text{CH}_3\text{CN}/\text{H}_2\text{O}$  (1:2, v/v) upon addition of different anions ( $\text{Na}^+$  salts in  $\text{H}_2\text{O}$ ).

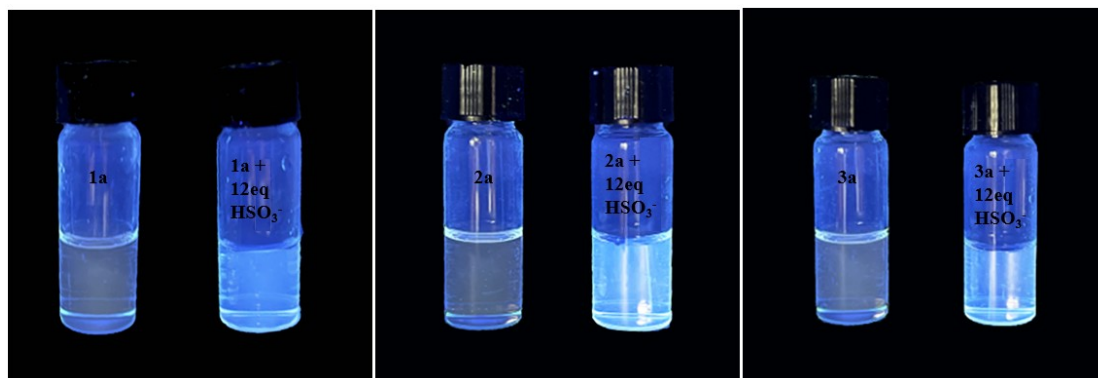

Fig. S24 PL emission photograph of **1a**, **2a** and **3a** before and after addition of  $\text{HSO}_3^-$ .

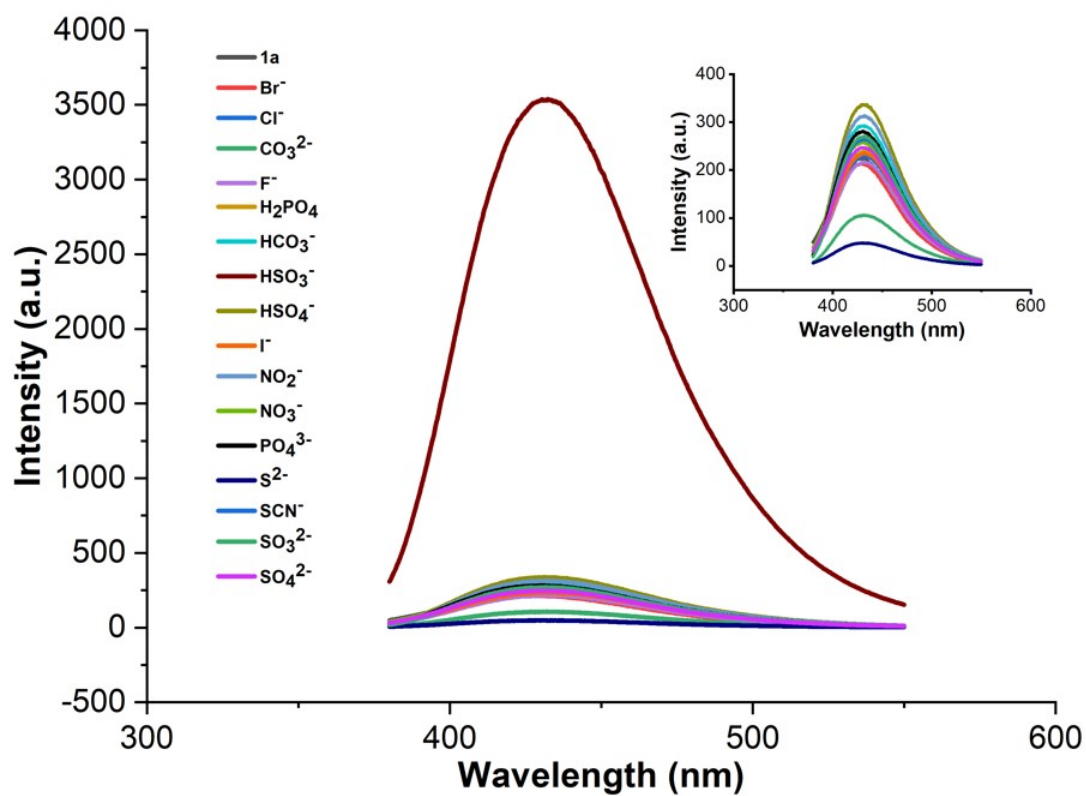

Fig. S25 Changes in fluorescent intensity for **1a** ( $1.0 \times 10^{-5}$  M) in  $\text{CH}_3\text{CN}/\text{H}_2\text{O}$  (1:2, v/v) upon addition of different anions ( $\text{Na}^+$  salts in  $\text{H}_2\text{O}$ ).

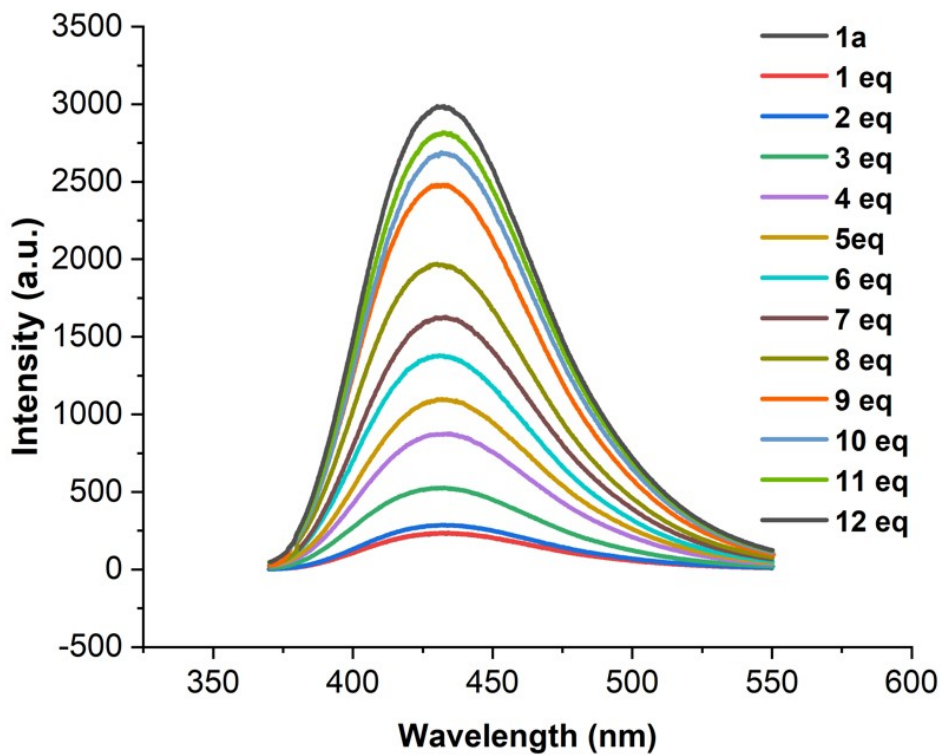

**Fig. S26** Fluorescence spectra of **1a** in  $\text{CH}_3\text{CN}/\text{H}_2\text{O}$  (1:2, v/v) for various concentrations of  $\text{HSO}_3^-$ .

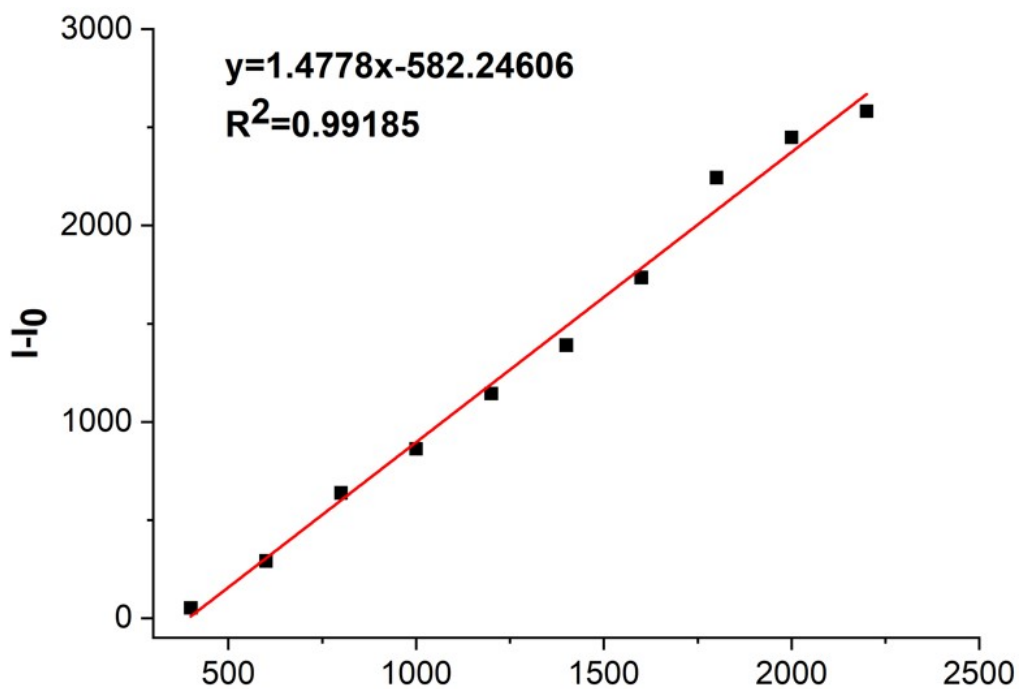

**Fig. S27** Linear plot of the enhancement coefficients of **1a** suspensions for sensing of  $\text{HSO}_3^-$ .



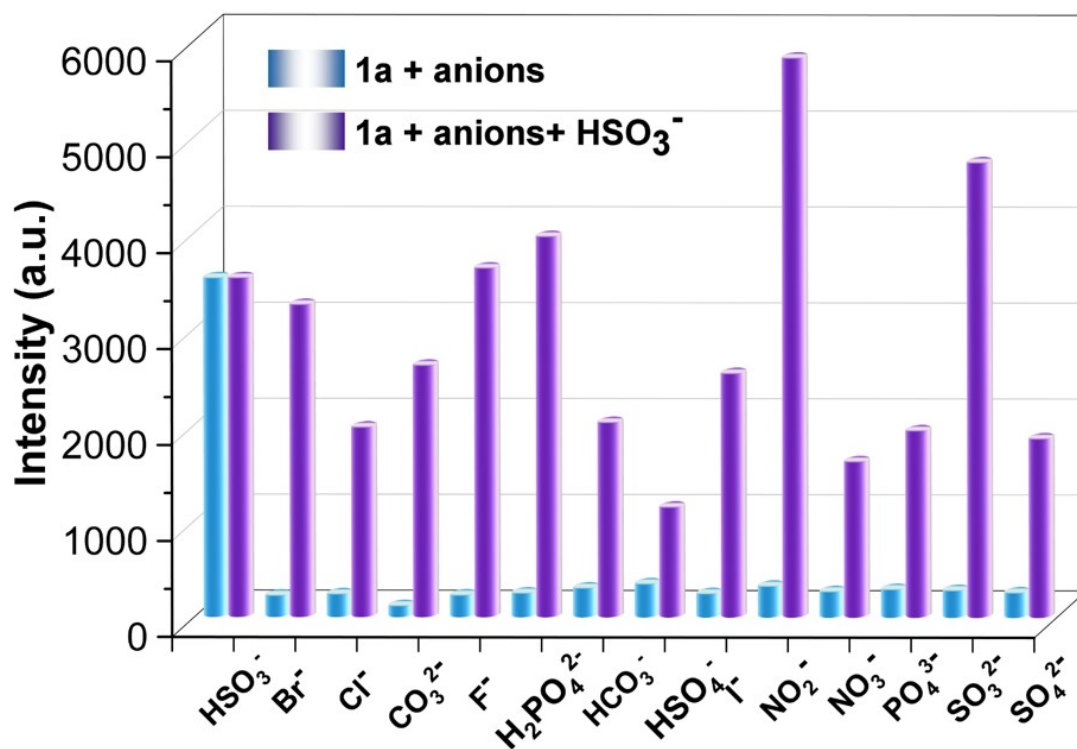

Fig. S28 Anti-interference ability of **1a** for luminescent sensing HSO<sub>3</sub><sup>-</sup>

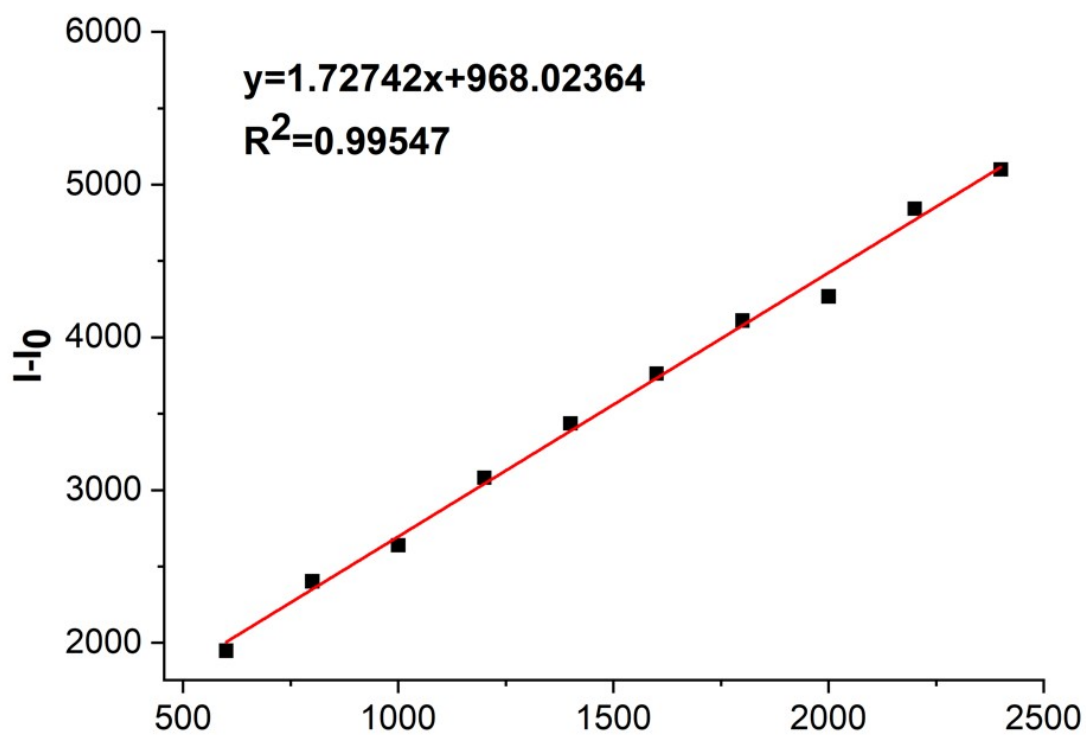

Fig. S29 Linear plot of the enhancement coefficients of **2a** suspensions for sensing of HSO<sub>3</sub><sup>-</sup>.

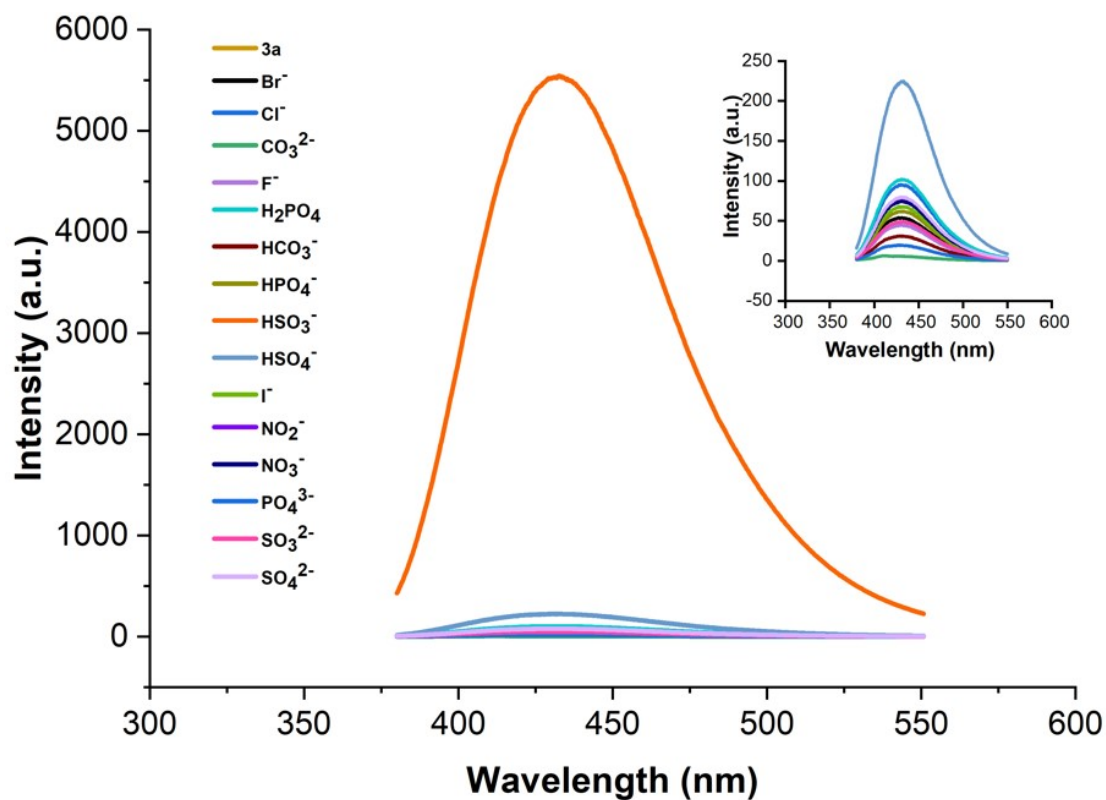

**Fig. S30** Changes in fluorescent intensity for **3a** ( $1.0 \times 10^{-5}$  M) in  $\text{CH}_3\text{CN}/\text{H}_2\text{O}$  (1:2, v/v) upon addition of different anions ( $\text{Na}^+$  salts in  $\text{H}_2\text{O}$ ).

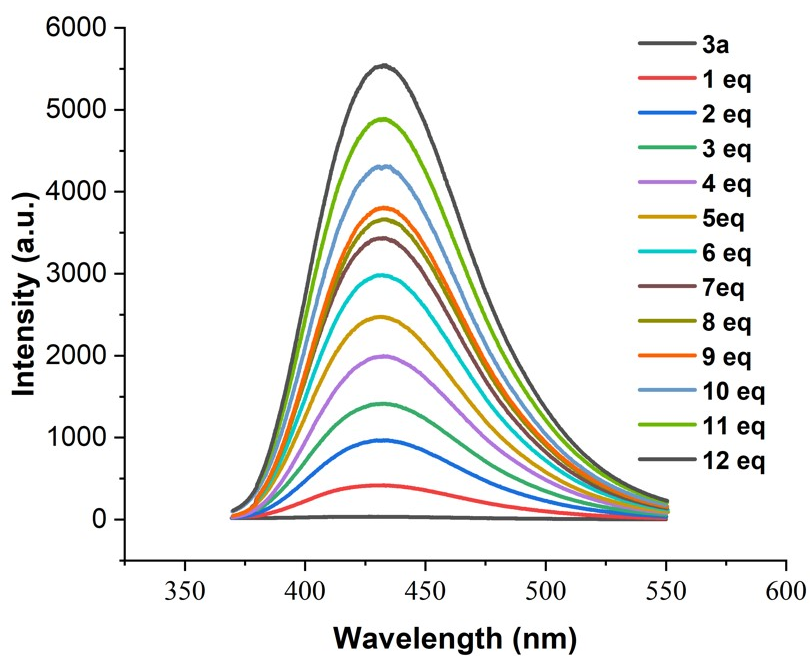

**Fig. S31** Fluorescence spectra of **3a** in  $\text{CH}_3\text{CN}/\text{H}_2\text{O}$  ((1:2, v/v) for various concentrations of  $\text{HSO}_3^-$ .

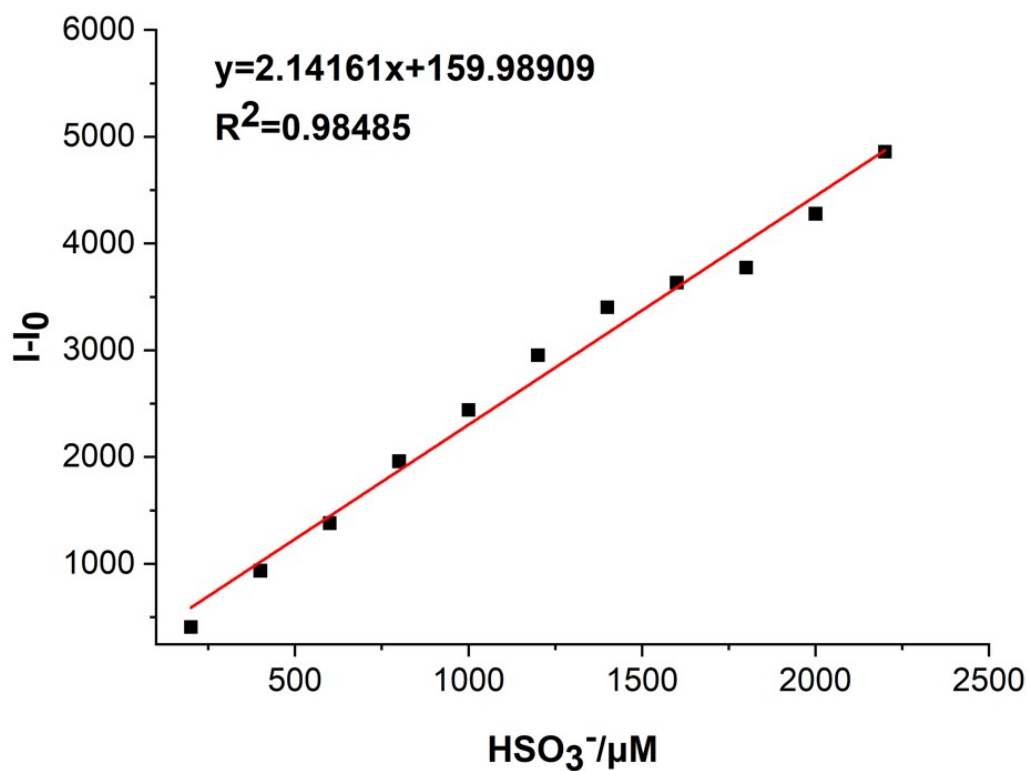

Fig. S32 Linear plot of the enhancement coefficients of **3a** suspensions for sensing of  $\text{HSO}_3^-$ .

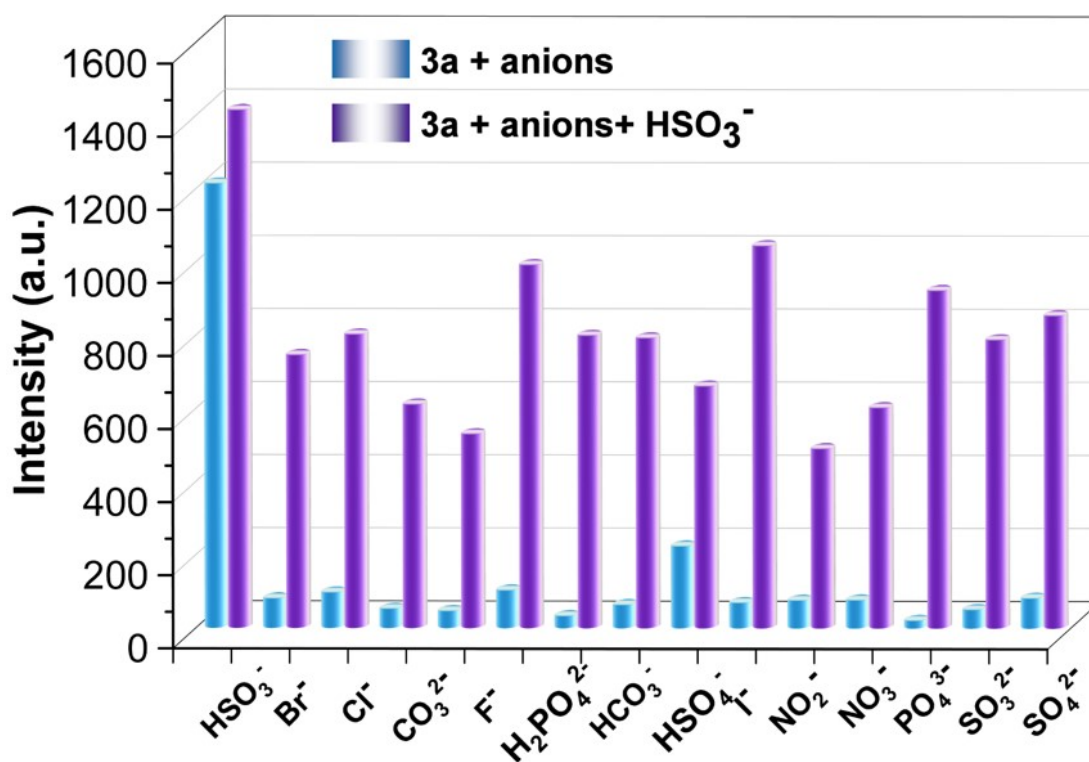

Fig. S33 Anti-interference ability of **3a** for luminescent sensing  $\text{HSO}_3^-$

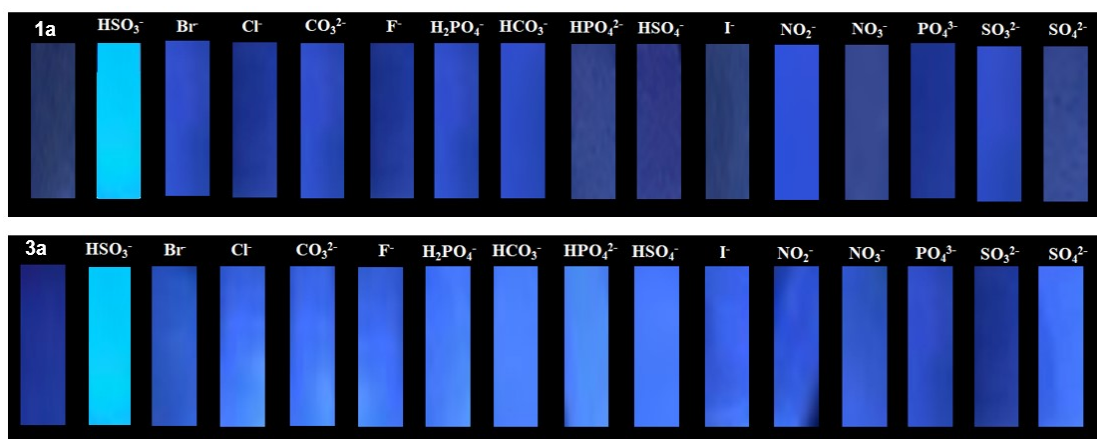

**Fig. S34** Photographs of strips of the luminescent test paper of **1a** and **3a** after exposure to various anions under a UV lamp ( $\lambda_{\text{ex}} = 365 \text{ nm}$ ).

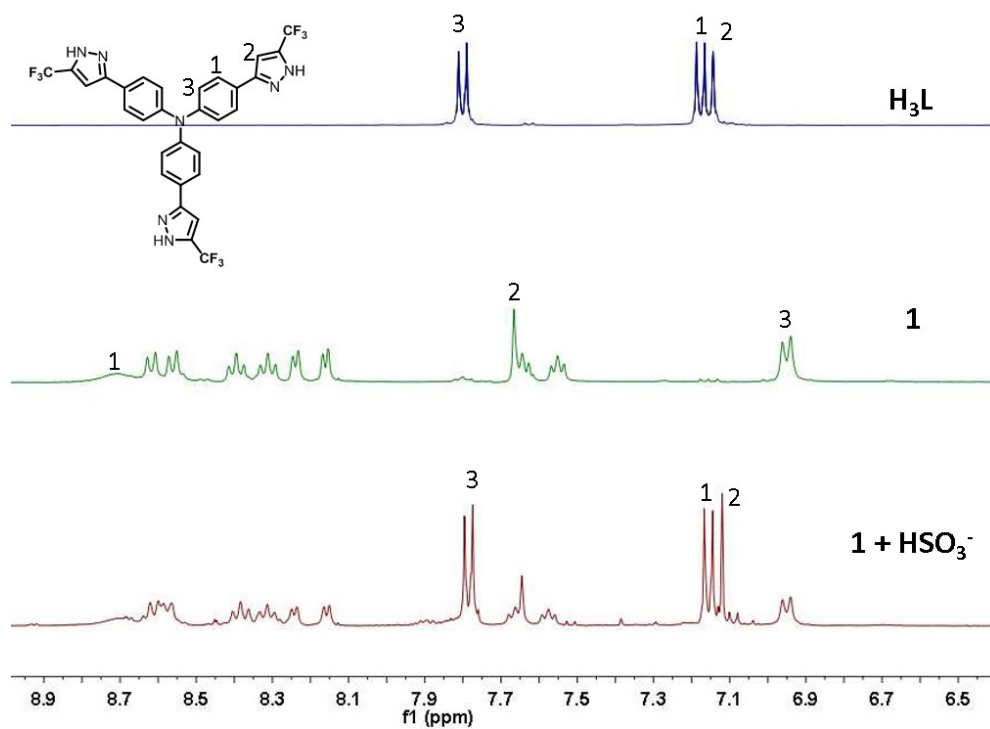

**Fig. S35**  $^1\text{H}$  NMR spectra of  $\text{H}_3\text{L}$  (a), **1** (b), **1** +  $\text{NaHSO}_3$  (c) in  $\text{DMSO-d}_6$ .

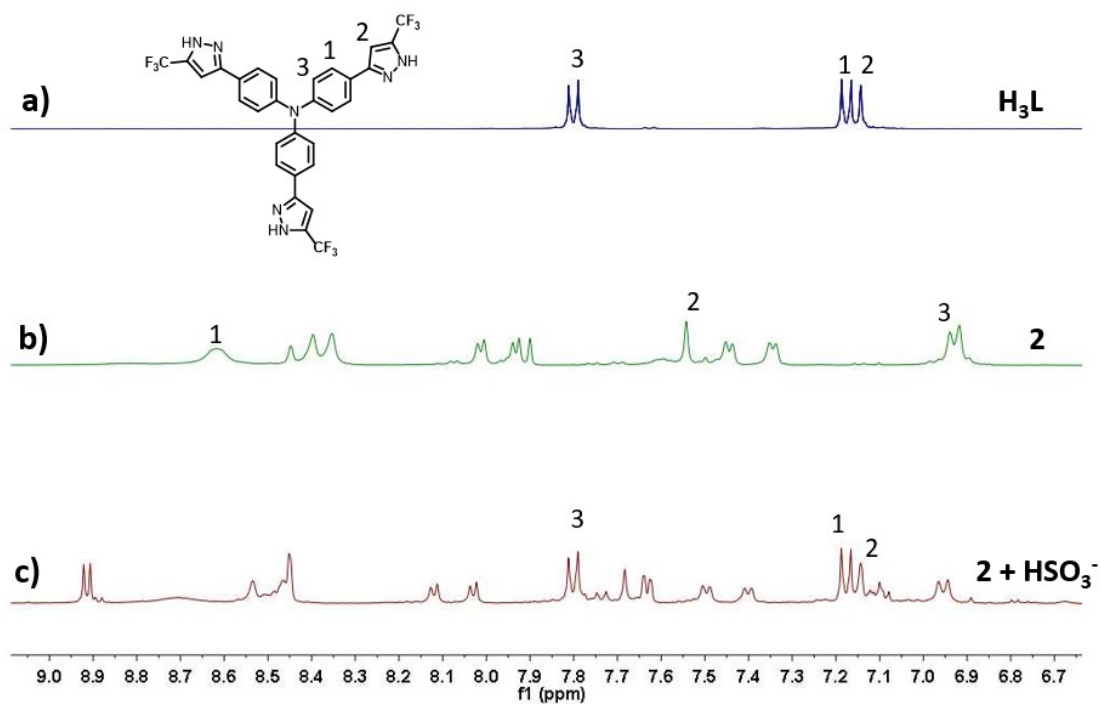

**Fig S36** <sup>1</sup>H NMR spectra of H<sub>3</sub>L (a), **2** (b), **2** + NaHSO<sub>3</sub> (c) in DMSO-d<sub>6</sub>.

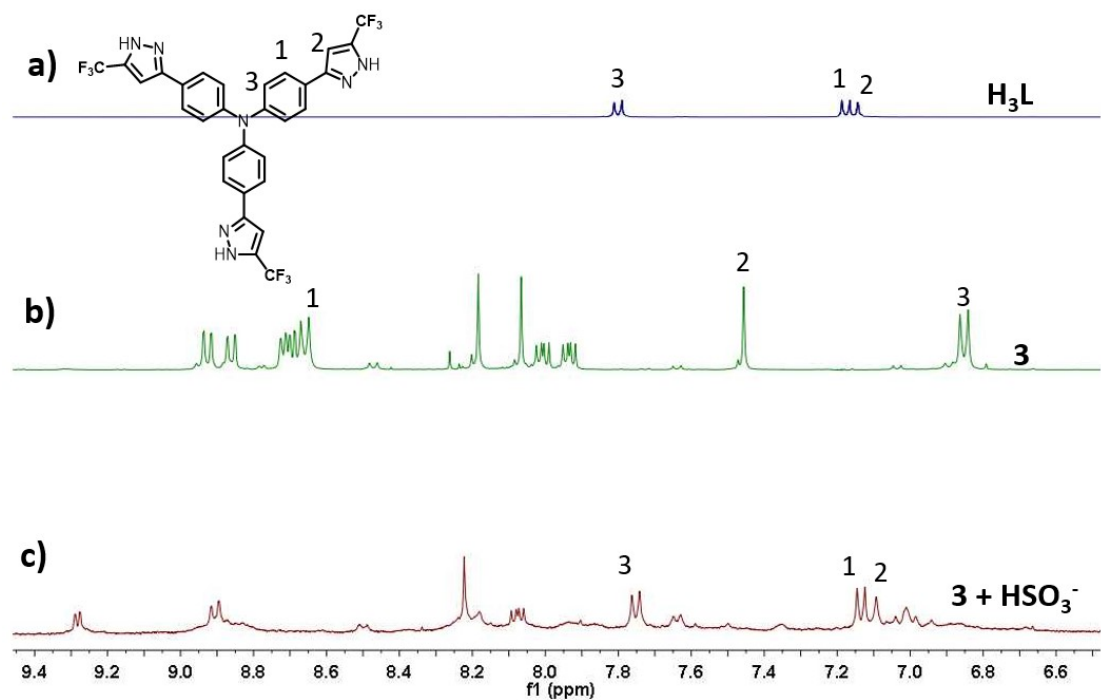

**Fig. S37** <sup>1</sup>H NMR spectra of H<sub>3</sub>L (a), **3** (b), **3** + NaHSO<sub>3</sub> (c) in DMSO-d<sub>6</sub>.

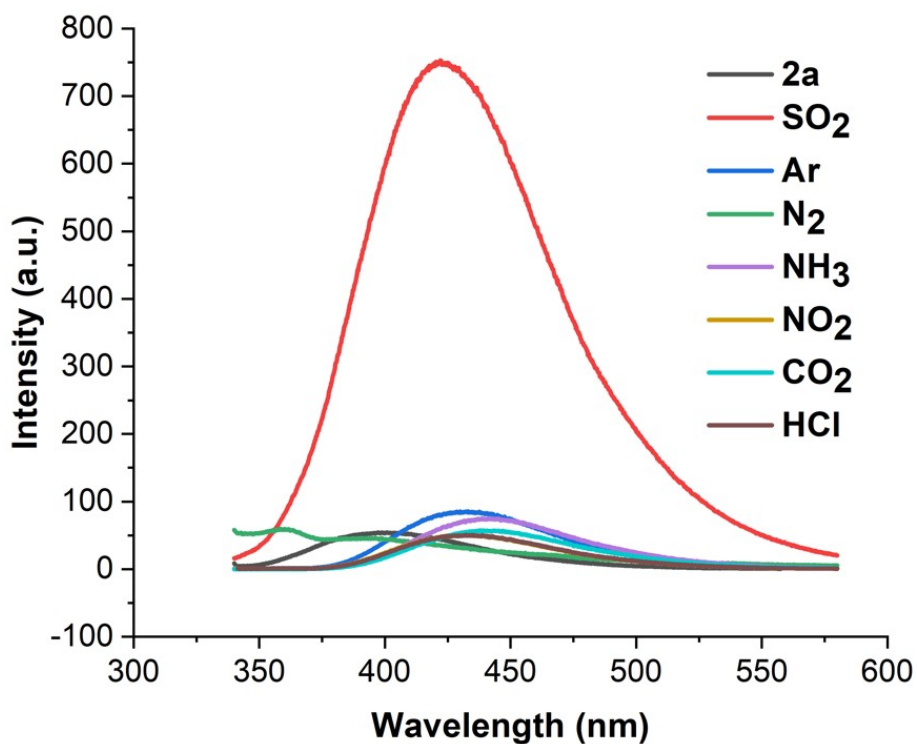

Fig. S38 Enhancement effect of various gas species on the fluorescence of 2a.

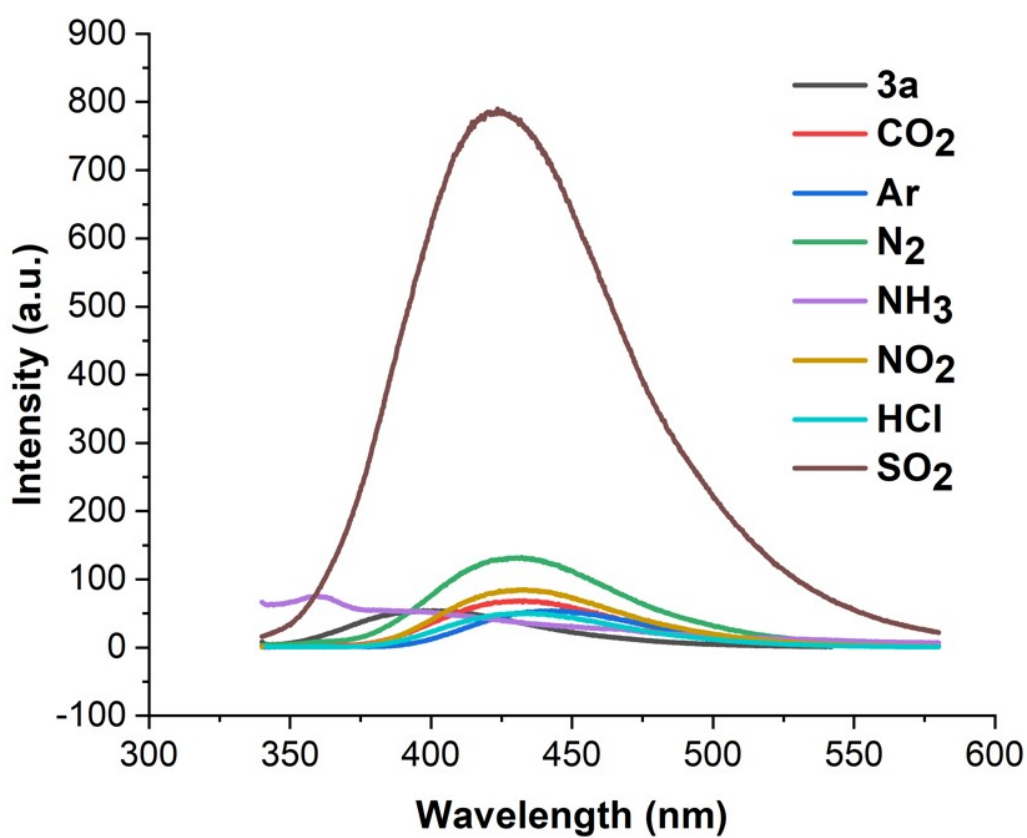

Fig. S39 Enhancement effect of various gas species on the fluorescence of 3a.

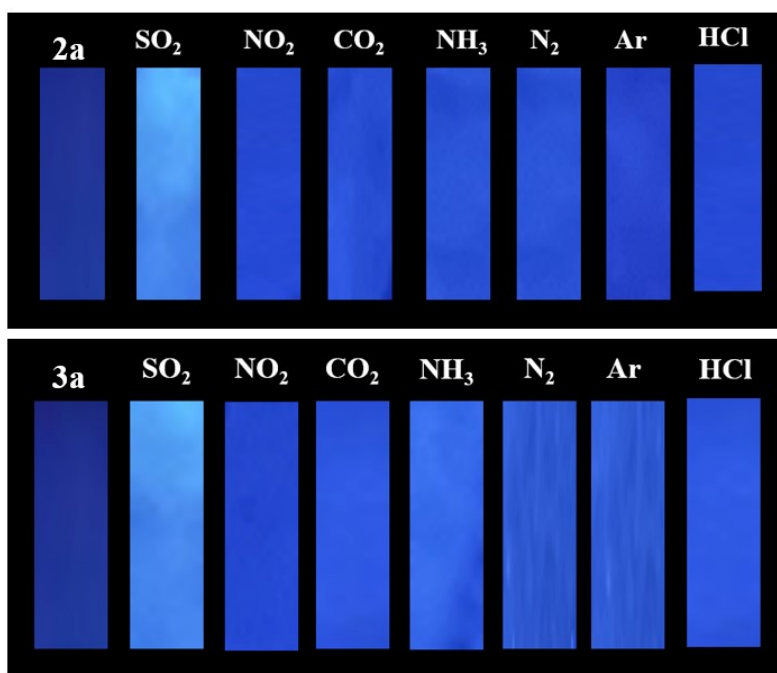

**Fig. S40** Photographs of strips of the luminescent test paper of **2a** and **3a** after exposure to various gases under a UV lamp ( $\lambda_{\text{ex}} = 365 \text{ nm}$ ).

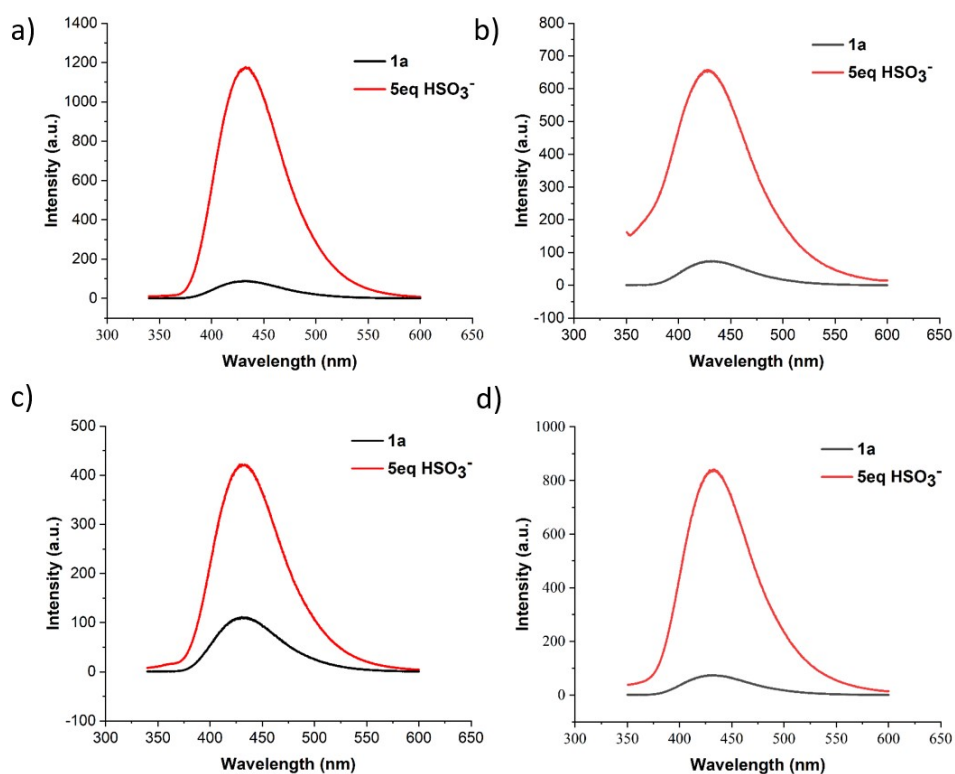

**Fig. S41** Detection of HSO<sub>3</sub><sup>-</sup> in practical water samples in **1a**: a) deionized water, b) tap water, c) sea-water, and d) lake water.

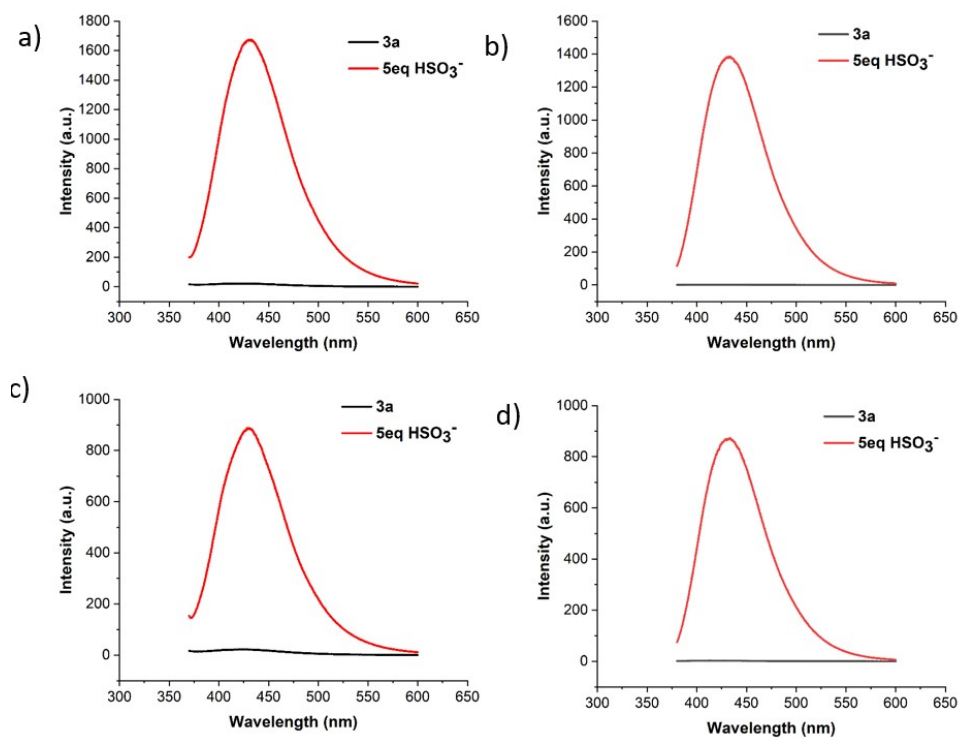

**Fig. S42** Detection of  $\text{HSO}_3^-$  in practical water samples in **3a**: a) deionized water, b) tap water, c) sea-water, and d) lake water.

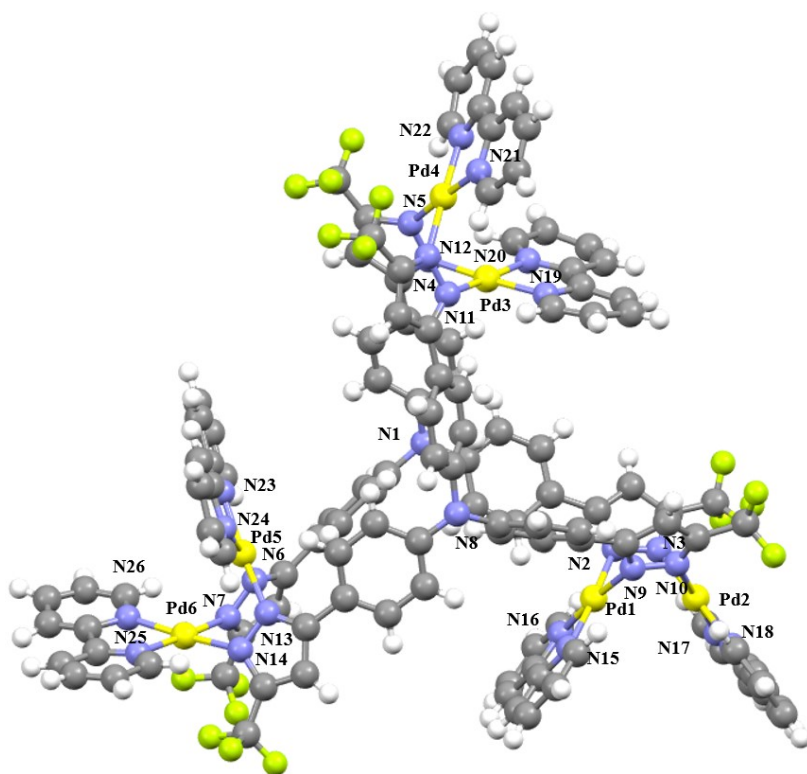

**Fig. S43** Single crystal structures of **1**.



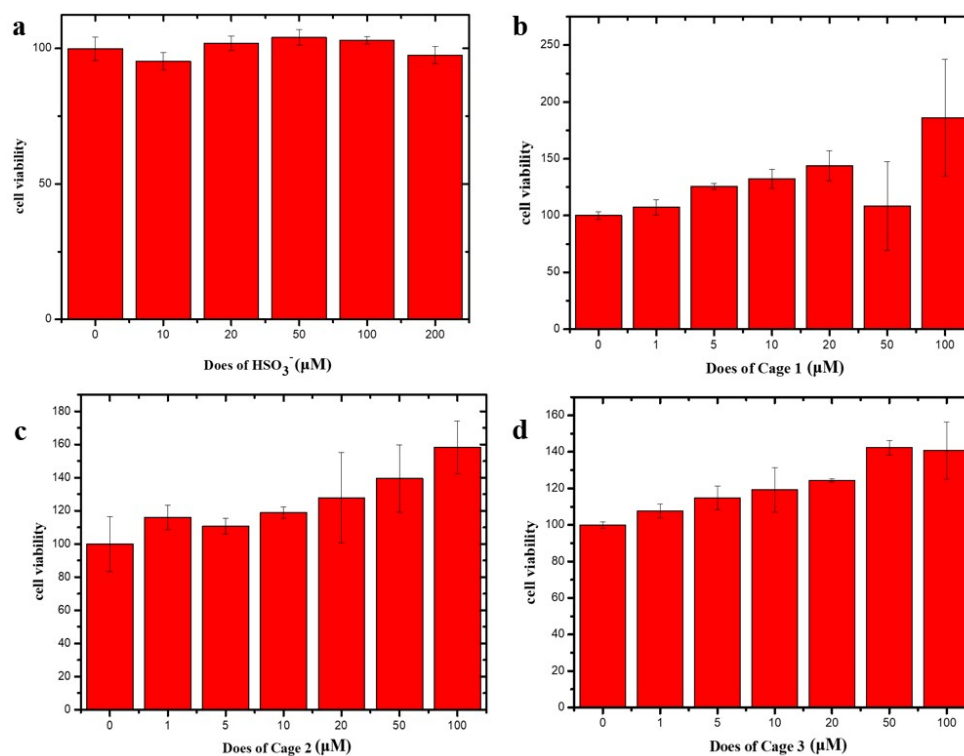

**Fig. S44** Cytotoxicity test of  $\text{HSO}_3^-$ , **1a**, **2a** and **3a** in HeLa cells.

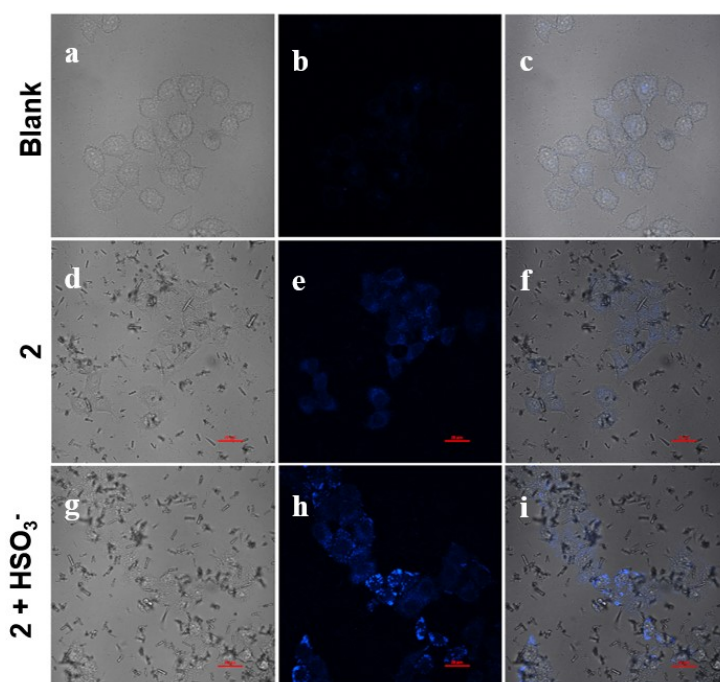

**Fig. S45** Fluorescence images of HeLa cells incubated with or without probe **2a** (10  $\mu\text{M}$ ) and  $\text{HSO}_3^-$  (0 eq or 12 eq); (a), (d) and (g) Bright field images; (b), (e) and (h) fluorescent images from the blue channel (from 429–474 nm) of laser scanning confocal microscope; (c), (f) and (i) Merge images.

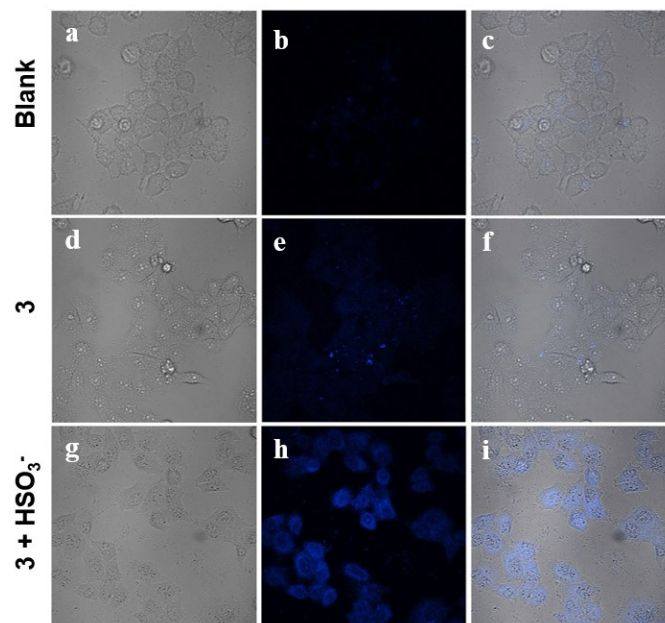

**Fig. S46** Fluorescence images of HeLa cells incubated with or without probe **3a** (10  $\mu\text{M}$ ) and  $\text{HSO}_3^-$  (0 eq or 12 eq); (a), (d) and (g) Bright field images; (b), (e) and (h) fluorescent images from the blue channel (from 429–474 nm) of laser scanning confocal microscope; (c), (f) and (i) Merge images.

Table S1 Crystallographic data for complexes  $1 \cdot 6\text{PF}_6^-$

|                                                   | $1 \cdot 6\text{PF}_6^-$                                                                             |
|---------------------------------------------------|------------------------------------------------------------------------------------------------------|
| Formula                                           | $\text{C}_{166}\text{H}_{198}\text{F}_{48}\text{N}_{26}\text{O}_{30}\text{P}_5\text{Pd}_6\text{S}_7$ |
| FW                                                | 4967.16                                                                                              |
| crystal system                                    | Monoclinic                                                                                           |
| space group                                       | $\text{C}12/a1$                                                                                      |
| a [ $\text{\AA}$ ]                                | 55.0704(4)                                                                                           |
| b [ $\text{\AA}$ ]                                | 31.5923(2)                                                                                           |
| c [ $\text{\AA}$ ]                                | 26.9571(2)                                                                                           |
| $\alpha$ [ $^\circ$ ]                             | 90                                                                                                   |
| $\beta$ [ $^\circ$ ]                              | 115.8350(10)                                                                                         |
| $\gamma$ [ $^\circ$ ]                             | 90                                                                                                   |
| V [ $\text{\AA}^3$ ]                              | 42212.4(6)                                                                                           |
| Z                                                 | 8                                                                                                    |
| $\rho$ calcd, [ $\text{Mg}/\text{cm}^3$ ]         | 1.563                                                                                                |
| $\mu$ [ $\text{mm}^{-1}$ ]                        | 6.026                                                                                                |
| F(000)                                            | 20088                                                                                                |
| $\theta$ max                                      | 2.157 to 77.116                                                                                      |
| reflections collected                             | 301265                                                                                               |
| Independent reflections                           | 42932 [ $ \text{R}(\text{int})  = 0.0588$ ]                                                          |
| goodness-of-fit on $F^2$                          | 1.013                                                                                                |
| $\text{R}_1, \text{wR}_2$ [ $I \geq 2\sigma(I)$ ] | $\text{R}_1 = 0.1317, \text{wR}_2 = 0.3177$                                                          |
| $\text{R}_1, \text{wR}_2$ [all data]              | $\text{R}_1 = 0.1395, \text{wR}_2 = 0.3255$                                                          |

Table S2. Selected bond distances (Å) and angles (°) of complex 1·6PF<sub>6</sub><sup>-</sup>.

| Bond Dist.[Å]      |           | Bond Dist.[Å]     |            |
|--------------------|-----------|-------------------|------------|
| Pd(1)-N(2)         | 2.009(10) | Pd(5)-N(14)       | 2.009(10)  |
| Pd(1)-N(9)         | 2.004(10) | Pd(5)-N(23)       | 2.001(8)   |
| Pd(1)-N(15)        | 1.965(7)  | Pd(5)-N(24)       | 2.001(11)  |
| Pd(1)-N(16)        | 2.003(10) | Pd(6)-N(7)        | 2.029(10)  |
| Pd(2)-N(3)         | 2.013(10) | Pd(6)-N(13)       | 2.019(9)   |
| Pd(2)-N(10)        | 2.017(11) | Pd(6)-N(25)       | 2.020(9)   |
| Pd(2)-N(17)        | 1.971(9)  | Pd(6)-N(26)       | 2.011(9)   |
| Pd(2)-N(18)        | 2.026(10) | N(4)-N(5)         | 1.328(11)  |
| Pd(3)-N(4)         | 2.028(9)  | N(13)-N(14)       | 1.369(11)  |
| Pd(3)-N(20)        | 2.023(10) | N(6)-N(7)         | 1.364(11)  |
| Pd(3)-N(19)        | 2.024(9)  | N(9)-N(10)        | 1.320(12)  |
| Pd(3)-N(12)        | 2.051(8)  | N(11)-N(12)       | 1.317(11)  |
| Pd(4)-N(5)         | 2.029(9)  | N(2)-N(3)         | 1.385(11)  |
| Pd(4)-N(11)        | 2.038(8)  | Pd(1)-Pd(2)       | 3.0147(11) |
| Pd(4)-N(21)        | 2.009(7)  | Pd(3)-Pd(4)       | 3.0896(10) |
| Pd(4)-N(22)        | 2.005(8)  | Pd(5)-Pd(6)       | 3.0530(10) |
| Pd(5)-N(6)         | 2.009(12) |                   |            |
| Bond Angel[°]      |           | Bond Angel[°]     |            |
| N(2)-Pd(1)-Pd(2)   | 66.7 (2)  | N(21)-Pd(4)-Pd(3) | 117.9(2)   |
| N(9)-Pd(1)-Pd(2)   | 65.6(3)   | N(21)-Pd(4)-N(5)  | 97.8(3)    |
| N(9)-Pd(1)-N(2)    | 85.5(4)   | N(21)-Pd(4)-N(11) | 177.2(3)   |
| N(15)-Pd(1)-Pd(2)  | 112.7(3)  | N(22)-Pd(4)-Pd(3) | 110.8(2)   |
| N(15)-Pd(1)-N(2)   | 97.1(4)   | N(22)-Pd(4)-N(5)  | 174.2(3)   |
| N(15)-Pd(1)-N(9)   | 176.1(4)  | N(22)-Pd(4)-(N11) | 96.2(4)    |
| N(15)-Pd(1)-N(16)  | 80.3(4)   | N(22)-Pd(4)N-(21) | 81.4(3)    |
| N(16)-Pd(1)-Pd(2)  | 110.2(3)  | N(6)-Pd(5)-Pd(6)  | 65.3(2)    |
| N(16)-Pd(1)-N(2)   | 175.0(4)  | N(14)-Pd(5)Pd-(6) | 64.6(2)    |
| N(16)-Pd(1)-N(9)   | 96.8(4)   | N(14)-Pd(5)-N(6)  | 84.8(4)    |
| N(3)-Pd(2)-Pd(1)   | 65.5(3)   | N(23)-Pd(5)-Pd(6) | 111.5(3)   |
| N(3)-Pd(2)-N(10)   | 84.7(5)   | N(23)-Pd(5)-N(6)  | 175.6(4)   |
| N(3)-Pd(2)-N(18)   | 176.6(6)  | N(23)-Pd(5)-N(14) | 96.5(4)    |
| N(10)-Pd(2)-Pd(1)  | 64.5(3)   | N(23)-Pd(5)-N(24) | 80.2(5)    |
| N(10)-Pd(2)-N(18)  | 98.6(5)   | N(24)-Pd(5)-Pd(6) | 115.9(3)   |
| N(17)-Pd(2)-N(3)   | 96.0(5)   | N(24)-Pd(5)-N(6)  | 98.5(5)    |
| N(17)-Pd(2)-N(10)  | 176.7(4)  | N(24)-Pd(5)-N(14) | 176.6(6)   |
| N(17)-Pd(2)-N(18)  | 80.6(5)   | N(7)-Pd(6)-Pd(5)  | 65.3(3)    |
| N(17)-Pd(2)-Pd(1)  | 112.8(3)  | N(13)-Pd(6)-Pd(5) | 66.0(2)    |
| N(18)-Pd(2)- Pd(1) | 115.3(3)  | N(13)-Pd(6)-N(7)  | 84.3(4)    |
| N(4)-Pd(3)- Pd(4)  | 64.0(2)   | N(13)-Pd(6)-N(25) | 174.2(3)   |
| N(4)-Pd(3)-N(12)   | 83.9(4)   | N(25)-Pd(6)-Pd(5) | 109.0(2)   |
| N(12)-Pd(3)-Pd(4)  | 64.3(3)   | N(25)-Pd(6)-N(7)  | 96.4(4)    |
| N(19)-Pd(3)-Pd(4)  | 115.7(3)  | N(26)-Pd(6)-Pd(5) | 119.4(2)   |
| N(19)-Pd(3)-N(4)   | 96.7(4)   | N(26)-Pd(6)-N(7)  | 175.2(4)   |
| N(19)-Pd(3)-N(12)  | 179.4(4)  | N(26)-Pd(6)-N(13) | 98.1(4)    |
| N(20)-Pd(3)-Pd(4)  | 117.1(3)  | N(26)-Pd(6)-N(25) | 81.6(4)    |

|                   |          |  |
|-------------------|----------|--|
| N(20)-Pd(3)-N(4)  | 177.9(4) |  |
| N(20)-Pd(3)-N(12) | 98.2(4)  |  |
| N(20)-Pd(3)-N(19) | 81.3(4)  |  |
| N(5)-Pd(4)-Pd(3)  | 64.4(2)  |  |
| N(5)-Pd(4)-N(11)  | 84.7(4)  |  |
| N(11)-Pd(4)-Pd(3) | 64.2(2)  |  |
